# Supplementary material
Source: PubMed Central journal article supplement (PMC4018453)
Supplement: NIHMS564301-supplement-Supporting_Information.pdf [file NIHMS564301-supplement-Supporting_Information.pdf]

**Microseconds Simulations of DNA and Ion Transport in Nanopores with Novel  
Ion-Ion and Ion-Nucleotides Effective Potentials**

Pablo M. De Biase\*, Suren Markosyan and Sergei Noskov\*

*Center for Molecular Simulations, Department of Biological Sciences, University of  
Calgary, Calgary, AB, Canada, T2N 1N4*

E-mail: pablo.debiase@ucalgary.ca or  
snoskov@ucalgary.ca

Phone: 1- 403-210-7971

Journal of Computational Chemistry.

## SUPPORTING INFORMATION

### EFFECTIVE POTENTIAL TABLES FOR 5'-CGCGAATATTCGCG-3'

Note:

-First column: Distance, Angstroms.

-Second column: Energy, unitless. To recover units, multiply values by  $k_B T$ .

| ADEN-CLA |           |        |           |        |           |
|----------|-----------|--------|-----------|--------|-----------|
|          |           | 10.200 | 0.3966685 | 16.000 | 0.2806494 |
|          |           | 10.300 | 0.3932706 | 16.100 | 0.2772529 |
|          |           | 10.400 | 0.4135006 | 16.200 | 0.2706599 |
| 4.600    | 6.275191  | 10.500 | 0.4031922 | 16.300 | 0.2692299 |
| 4.700    | 4.430860  | 10.600 | 0.3934365 | 16.400 | 0.2688303 |
| 4.800    | 3.869251  | 10.700 | 0.4151084 | 16.500 | 0.2661968 |
| 4.900    | 2.946994  | 10.800 | 0.3838675 | 16.600 | 0.2640215 |
| 5.000    | 2.344133  | 10.900 | 0.3962580 | 16.700 | 0.2604676 |
| 5.100    | 1.782343  | 11.000 | 0.3769198 | 16.800 | 0.2597968 |
| 5.200    | 1.519890  | 11.100 | 0.3762966 | 16.900 | 0.2601218 |
| 5.300    | 1.351673  | 11.200 | 0.3586226 | 17.000 | 0.2476455 |
| 5.400    | 1.220463  | 11.300 | 0.3589025 | 17.100 | 0.2531280 |
| 5.500    | 1.035465  | 11.400 | 0.3668304 | 17.200 | 0.2525808 |
| 5.600    | 0.7966225 | 11.500 | 0.3419389 | 17.300 | 0.2347122 |
| 5.700    | 0.6495936 | 11.600 | 0.3622531 | 17.400 | 0.2402054 |
| 5.800    | 0.5413689 | 11.700 | 0.3534094 | 17.500 | 0.2336236 |
| 5.900    | 0.6102789 | 11.800 | 0.3236214 | 17.600 | 0.2330063 |
| 6.000    | 0.6153855 | 11.900 | 0.3216270 | 17.700 | 0.2363046 |
| 6.100    | 0.5569350 | 12.000 | 0.3253117 | 17.800 | 0.2347699 |
| 6.200    | 0.5737003 | 12.100 | 0.2968748 | 17.900 | 0.2265380 |
| 6.300    | 0.5461407 | 12.200 | 0.3136732 | 18.000 | 0.2224109 |
| 6.400    | 0.4919113 | 12.300 | 0.2874018 | 18.100 | 0.2207694 |
| 6.500    | 0.4809606 | 12.400 | 0.2829490 | 18.200 | 0.2186020 |
| 6.600    | 0.5276676 | 12.500 | 0.2747918 | 18.300 | 0.2188159 |
| 6.700    | 0.5306777 | 12.600 | 0.2715735 | 18.400 | 0.2142094 |
| 6.800    | 0.6000432 | 12.700 | 0.2642962 | 18.500 | 0.2072564 |
| 6.900    | 0.6138090 | 12.800 | 0.2781430 | 18.600 | 0.2082727 |
| 7.000    | 0.6654889 | 12.900 | 0.2867956 | 18.700 | 0.1991969 |
| 7.100    | 0.7347722 | 13.000 | 0.2817038 | 18.800 | 0.1993057 |
| 7.200    | 0.6797023 | 13.100 | 0.2820075 | 18.900 | 0.1960592 |
| 7.300    | 0.6939666 | 13.200 | 0.2894089 | 19.000 | 0.1816521 |
| 7.400    | 0.6125463 | 13.300 | 0.2923521 | 19.100 | 0.1833670 |
| 7.500    | 0.6197615 | 13.400 | 0.2900139 | 19.200 | 0.1798103 |
| 7.600    | 0.5933378 | 13.500 | 0.2908944 | 19.300 | 0.1790910 |
| 7.700    | 0.5641296 | 13.600 | 0.2913169 | 19.400 | 0.1878636 |
| 7.800    | 0.5278741 | 13.700 | 0.2895683 | 19.500 | 0.1715441 |
| 7.900    | 0.5137326 | 13.800 | 0.3019423 | 19.600 | 0.1689784 |
| 8.000    | 0.4938717 | 13.900 | 0.2855382 | 19.700 | 0.1644630 |
| 8.100    | 0.4136295 | 14.000 | 0.2829443 | 19.800 | 0.1683201 |
| 8.200    | 0.3871320 | 14.100 | 0.2899823 | 19.900 | 0.1652341 |
| 8.300    | 0.3895231 | 14.200 | 0.2803497 | 20.000 | 0.1643611 |
| 8.400    | 0.3421119 | 14.300 | 0.2796266 | 20.100 | 0.1641412 |
| 8.500    | 0.3456819 | 14.400 | 0.2791043 | 20.200 | 0.1594027 |
| 8.600    | 0.3355383 | 14.500 | 0.2851535 | 20.300 | 0.1595766 |
| 8.700    | 0.3269449 | 14.600 | 0.2769777 | 20.400 | 0.1533481 |
| 8.800    | 0.3051023 | 14.700 | 0.2815617 | 20.500 | 0.1460843 |
| 8.900    | 0.3077692 | 14.800 | 0.2786146 | 20.600 | 0.1496376 |
| 9.000    | 0.3225231 | 14.900 | 0.2656456 | 20.700 | 0.1490497 |
| 9.100    | 0.2849686 | 15.000 | 0.2788318 | 20.800 | 0.1468018 |
| 9.200    | 0.3085511 | 15.100 | 0.2721364 | 20.900 | 0.1398933 |
| 9.300    | 0.2968901 | 15.200 | 0.2790293 | 21.000 | 0.1441655 |
| 9.400    | 0.3246411 | 15.300 | 0.2767156 | 21.100 | 0.1475227 |
| 9.500    | 0.2948020 | 15.400 | 0.2761949 | 21.200 | 0.1483591 |
| 9.600    | 0.3349143 | 15.500 | 0.2832443 | 21.300 | 0.1426789 |
| 9.700    | 0.3258481 | 15.600 | 0.2767753 | 21.400 | 0.1392419 |
| 9.800    | 0.3448754 | 15.700 | 0.2800412 | 21.500 | 0.1384720 |
| 9.900    | 0.3667220 | 15.800 | 0.2745243 | 21.600 | 0.1452914 |
| 10.000   | 0.3904641 | 15.900 | 0.2844407 | 21.700 | 0.1383750 |
| 10.100   | 0.3737477 |        |           |        |           |

|                     |                   |                       |                       |
|---------------------|-------------------|-----------------------|-----------------------|
| ADEN-POT            | 9.300 -0.3654809  | 15.100 -0.2318404     | 20.900 -6.5338627E-02 |
| -----               | 9.400 -0.3869857  | 15.200 -0.2271038     | 21.000 -5.9824329E-02 |
| 3.700 5.823866      | 9.500 -0.4051316  | 15.300 -0.2492770     | 21.100 -6.7955524E-02 |
| 3.800 4.830453      | 9.600 -0.4288678  | 15.400 -0.2515312     | 21.200 -7.8451537E-02 |
| 3.900 3.626843      | 9.700 -0.4280207  | 15.500 -0.2445592     | 21.300 -7.5481072E-02 |
| 4.000 2.589006      | 9.800 -0.4450441  | 15.600 -0.2428236     | 21.400 -7.9882421E-02 |
| 4.100 1.662583      | 9.900 -0.4378845  | 15.700 -0.2264623     | 21.500 -8.2923502E-02 |
| 4.200 0.5225589     | 10.000 -0.4525556 | 15.800 -0.2302734     | 21.600 -7.5244822E-02 |
| 4.300 -0.2873176    | 10.100 -0.4596857 | 15.900 -0.2097082     | 21.700 -6.0947850E-02 |
| 4.400 -0.8512484    | 10.200 -0.4705088 | 16.000 -0.1978195     | 21.800 -5.5392675E-02 |
| 4.500 -1.183246     | 10.300 -0.5051066 | 16.100 -0.1831966     | 21.900 -5.0427143E-02 |
| 4.600 -1.369327     | 10.400 -0.4829183 | 16.200 -0.1896270     | 22.000 -4.2186033E-02 |
| 4.700 -1.389319     | 10.500 -0.4352216 | 16.300 -0.1751161     | 22.100 -4.1080706E-02 |
| 4.800 -1.261334     | 10.600 -0.3872201 | 16.400 -0.1714357     | 22.200 -3.8007282E-02 |
| 4.900 -0.9495065    | 10.700 -0.3374027 | 16.500 -0.1806071     | 22.300 -2.3814891E-02 |
| 5.000 -0.5782006    | 10.800 -0.3054451 | 16.600 -0.1770872     | 22.400 -2.6937034E-02 |
| 5.100 -0.2095949    | 10.900 -0.2898153 | 16.700 -0.1840022     | 22.500 -3.1454567E-02 |
| 5.200 7.5885914E-03 | 11.000 -0.2810605 | 16.800 -0.1906870     | 22.600 -2.8332697E-02 |
| 5.300 0.2108459     | 11.100 -0.2772306 | 16.900 -0.2012826     | 22.700 -3.9898194E-02 |
| 5.400 0.2416409     | 11.200 -0.2757280 | 17.000 -0.1995088     | 22.800 -4.7378808E-02 |
| 5.500 0.2717444     | 11.300 -0.2707560 | 17.100 -0.2170300     | 22.900 -4.9630761E-02 |
| 5.600 0.2885835     | 11.400 -0.2641954 | 17.200 -0.2177301     | 23.000 -4.8684251E-02 |
| 5.700 0.2283445     | 11.500 -0.2600666 | 17.300 -0.2102893     | 23.100 -5.8763023E-02 |
| 5.800 0.1682126     | 11.600 -0.2550561 | 17.400 -0.2083118     | 23.200 -5.9486061E-02 |
| 5.900 3.7523400E-02 | 11.700 -0.2565394 | 17.500 -0.1983358     | 23.300 -5.9855293E-02 |
| 6.000 -0.1234927    | 11.800 -0.2604895 | 17.600 -0.1943054     | 23.400 -6.0991410E-02 |
| 6.100 -0.2952285    | 11.900 -0.2714023 | 17.700 -0.1916489     | 23.500 -5.7892993E-02 |
| 6.200 -0.4087549    | 12.000 -0.2588945 | 17.800 -0.1969596     | 23.600 -5.3160839E-02 |
| 6.300 -0.5181666    | 12.100 -0.2584465 | 17.900 -0.2090004     | 23.700 -4.9223199E-02 |
| 6.400 -0.5851451    | 12.200 -0.2468275 | 18.000 -0.2246521     | 23.800 -5.3082325E-02 |
| 6.500 -0.6549737    | 12.300 -0.2476862 | 18.100 -0.2463524     | 23.900 -6.1556026E-02 |
| 6.600 -0.6780289    | 12.400 -0.2402109 | 18.200 -0.2494937     | 24.000 -6.3027397E-02 |
| 6.700 -0.7371394    | 12.500 -0.2357930 | 18.300 -0.2574614     | 24.100 -6.1386049E-02 |
| 6.800 -0.7675223    | 12.600 -0.2456929 | 18.400 -0.2545450     | 24.200 -5.8747228E-02 |
| 6.900 -0.7765132    | 12.700 -0.2671854 | 18.500 -0.2576107     | 24.300 -4.6480995E-02 |
| 7.000 -0.7499299    | 12.800 -0.2801179 | 18.600 -0.2377700     | 24.400 -4.2273499E-02 |
| 7.100 -0.6855152    | 12.900 -0.2988797 | 18.700 -0.2059840     | 24.500 -3.2011628E-02 |
| 7.200 -0.5956191    | 13.000 -0.3237736 | 18.800 -0.1701193     | 24.600 -2.6168656E-02 |
| 7.300 -0.5084925    | 13.100 -0.3177316 | 18.900 -0.1429040     | 24.700 -1.9882577E-02 |
| 7.400 -0.4395537    | 13.200 -0.3065937 | 19.000 -0.1286221     | 24.800 -1.5944479E-02 |
| 7.500 -0.3500884    | 13.300 -0.2790858 | 19.100 -0.1242344     | 24.900 -1.2371726E-02 |
| 7.600 -0.3064012    | 13.400 -0.2782788 | 19.200 -0.1102132     | 25.000 -1.6607041E-02 |
| 7.700 -0.2395393    | 13.500 -0.2634299 | 19.300 -0.1051066     |                       |
| 7.800 -0.1922011    | 13.600 -0.2747125 | 19.400 -0.1015351     |                       |
| 7.900 -0.1787427    | 13.700 -0.2793078 | 19.500 -9.6317150E-02 |                       |
| 8.000 -0.1973425    | 13.800 -0.2649381 | 19.600 -9.8074801E-02 |                       |
| 8.100 -0.2028206    | 13.900 -0.2694251 | 19.700 -9.4659962E-02 |                       |
| 8.200 -0.2007631    | 14.000 -0.2493766 | 19.800 -8.8294804E-02 |                       |
| 8.300 -0.2409886    | 14.100 -0.2384678 | 19.900 -9.5507771E-02 |                       |
| 8.400 -0.2614102    | 14.200 -0.2485929 | 20.000 -8.7502360E-02 |                       |
| 8.500 -0.2631228    | 14.300 -0.2374317 | 20.100 -8.5994020E-02 |                       |
| 8.600 -0.2670591    | 14.400 -0.2409355 | 20.200 -8.3079837E-02 |                       |
| 8.700 -0.3258018    | 14.500 -0.2350250 | 20.300 -7.6149724E-02 |                       |
| 8.800 -0.2983544    | 14.600 -0.2315380 | 20.400 -7.5042635E-02 |                       |
| 8.900 -0.3074777    | 14.700 -0.2262674 | 20.500 -7.4032977E-02 |                       |
| 9.000 -0.3176167    | 14.800 -0.2253306 | 20.600 -7.0859246E-02 |                       |
| 9.100 -0.3242219    | 14.900 -0.2122319 | 20.700 -6.0718402E-02 |                       |
| 9.200 -0.3541594    | 15.000 -0.2262747 | 20.800 -6.1407033E-02 |                       |

| CLA-CLA |          |        |          |        |               |
|---------|----------|--------|----------|--------|---------------|
|         |          | 9.200  | 2.124074 | 15.000 | 1.110396      |
|         |          | 9.300  | 2.089406 | 15.100 | 1.096191      |
|         |          | 9.400  | 2.058543 | 15.200 | 1.082186      |
|         |          | 9.500  | 2.030780 | 15.300 | 1.067529      |
|         |          | 9.600  | 2.007750 | 15.400 | 1.053702      |
|         |          | 9.700  | 1.984434 | 15.500 | 1.038679      |
|         |          | 9.800  | 1.967689 | 15.600 | 1.024675      |
|         |          | 9.900  | 1.949596 | 15.700 | 1.009431      |
|         |          | 10.000 | 1.934898 | 15.800 | 0.9958074     |
|         |          | 10.100 | 1.920433 | 15.900 | 0.9826900     |
|         |          | 10.200 | 1.908101 | 16.000 | 0.9664766     |
|         |          | 10.300 | 1.897207 | 16.100 | 0.9525729     |
|         |          | 10.400 | 1.884707 | 16.200 | 0.9390121     |
|         |          | 10.500 | 1.871229 | 16.300 | 0.9254641     |
|         |          | 10.600 | 1.857259 | 16.400 | 0.9109476     |
|         |          | 10.700 | 1.841165 | 16.500 | 0.8975403     |
|         |          | 10.800 | 1.825401 | 16.600 | 0.8842714     |
|         |          | 10.900 | 1.808691 | 16.700 | 0.8701431     |
|         |          | 11.000 | 1.788779 | 16.800 | 0.8564106     |
|         |          | 11.100 | 1.768374 | 16.900 | 0.8429867     |
|         |          | 11.200 | 1.748141 | 17.000 | 0.8315244     |
|         |          | 11.300 | 1.726041 | 17.100 | 0.8174437     |
|         |          | 11.400 | 1.706429 | 17.200 | 0.8034174     |
|         |          | 11.500 | 1.682877 | 17.300 | 0.7910219     |
|         |          | 11.600 | 1.663843 | 17.400 | 0.7785522     |
|         |          | 11.700 | 1.643567 | 17.500 | 0.7657648     |
|         |          | 11.800 | 1.623838 | 17.600 | 0.7528368     |
|         |          | 11.900 | 1.605186 | 17.700 | 0.7413442     |
|         |          | 12.000 | 1.586698 | 17.800 | 0.7283924     |
|         |          | 12.100 | 1.568778 | 17.900 | 0.7150487     |
|         |          | 12.200 | 1.553683 | 18.000 | 0.7035006     |
|         |          | 12.300 | 1.535778 | 18.100 | 0.6901082     |
|         |          | 12.400 | 1.521535 | 18.200 | 0.6791989     |
|         |          | 12.500 | 1.504934 | 18.300 | 0.6670607     |
|         |          | 12.600 | 1.489217 | 18.400 | 0.6544895     |
|         |          | 12.700 | 1.475452 | 18.500 | 0.6430858     |
|         |          | 12.800 | 1.460029 | 18.600 | 0.6316419     |
|         |          | 12.900 | 1.443288 | 18.700 | 0.6209736     |
|         |          | 13.000 | 1.427909 | 18.800 | 0.6077669     |
|         |          | 13.100 | 1.412861 | 18.900 | 0.5975571     |
|         |          | 13.200 | 1.396798 | 19.000 | 0.5867700     |
|         |          | 13.300 | 1.379317 | 19.100 | 0.5748860     |
|         |          | 13.400 | 1.363672 | 19.200 | 0.5637912     |
|         |          | 13.500 | 1.347143 | 19.300 | 0.5515422     |
|         |          | 13.600 | 1.330609 | 19.400 | 0.5410807     |
|         |          | 13.700 | 1.313605 | 19.500 | 0.5307782     |
|         |          | 13.800 | 1.297570 | 19.600 | 0.5206046     |
|         |          | 13.900 | 1.281132 | 19.700 | 0.5098471     |
|         |          | 14.000 | 1.264917 | 19.800 | 0.4992399     |
|         |          | 14.100 | 1.248762 | 19.900 | 0.4879444     |
|         |          | 14.200 | 1.232210 | 20.000 | 0.4767059     |
|         |          | 14.300 | 1.216897 | 20.100 | 0.4670001     |
|         |          | 14.400 | 1.201239 | 20.200 | 0.4568268     |
|         |          | 14.500 | 1.185380 | 20.300 | 0.4463753     |
|         |          | 14.600 | 1.170908 | 20.400 | 0.4368619     |
|         |          | 14.700 | 1.155357 | 20.500 | 0.4261756     |
|         |          | 14.800 | 1.141744 | 20.600 | 0.4169522     |
|         |          | 14.900 | 1.126366 | 20.700 | 0.4070072     |
|         |          |        |          | 20.800 | 0.3979504     |
|         |          |        |          | 20.900 | 0.3880099     |
|         |          |        |          | 21.000 | 0.3778784     |
|         |          |        |          | 21.100 | 0.3696870     |
|         |          |        |          | 21.200 | 0.3603787     |
|         |          |        |          | 21.300 | 0.3517459     |
|         |          |        |          | 21.400 | 0.3431346     |
|         |          |        |          | 21.500 | 0.3343790     |
|         |          |        |          | 21.600 | 0.3259499     |
|         |          |        |          | 21.700 | 0.3173027     |
|         |          |        |          | 21.800 | 0.3084097     |
|         |          |        |          | 21.900 | 0.3015210     |
|         |          |        |          | 22.000 | 0.2930541     |
|         |          |        |          | 22.100 | 0.2842095     |
|         |          |        |          | 22.200 | 0.2752714     |
|         |          |        |          | 22.300 | 0.2677370     |
|         |          |        |          | 22.400 | 0.2596724     |
|         |          |        |          | 22.500 | 0.2519732     |
|         |          |        |          | 22.600 | 0.2439752     |
|         |          |        |          | 22.700 | 0.2361290     |
|         |          |        |          | 22.800 | 0.2294414     |
|         |          |        |          | 22.900 | 0.2218741     |
|         |          |        |          | 23.000 | 0.2146563     |
|         |          |        |          | 23.100 | 0.2077851     |
|         |          |        |          | 23.200 | 0.2012418     |
|         |          |        |          | 23.300 | 0.1934265     |
|         |          |        |          | 23.400 | 0.1878581     |
|         |          |        |          | 23.500 | 0.1810862     |
|         |          |        |          | 23.600 | 0.1752418     |
|         |          |        |          | 23.700 | 0.1684643     |
|         |          |        |          | 23.800 | 0.1630541     |
|         |          |        |          | 23.900 | 0.1569004     |
|         |          |        |          | 24.000 | 0.1505542     |
|         |          |        |          | 24.100 | 0.1447470     |
|         |          |        |          | 24.200 | 0.1394918     |
|         |          |        |          | 24.300 | 0.1345038     |
|         |          |        |          | 24.400 | 0.1289065     |
|         |          |        |          | 24.500 | 0.1240161     |
|         |          |        |          | 24.600 | 0.1179095     |
|         |          |        |          | 24.700 | 0.1134071     |
|         |          |        |          | 24.800 | 0.1079139     |
|         |          |        |          | 24.900 | 0.1036502     |
|         |          |        |          | 25.000 | 9.8845936E-02 |
| 3.600   | 12.63362 |        |          |        |               |
| 3.700   | 10.65078 |        |          |        |               |
| 3.800   | 9.186367 |        |          |        |               |
| 3.900   | 7.847548 |        |          |        |               |
| 4.000   | 6.752626 |        |          |        |               |
| 4.100   | 5.816236 |        |          |        |               |
| 4.200   | 5.041437 |        |          |        |               |
| 4.300   | 4.387738 |        |          |        |               |
| 4.400   | 3.834338 |        |          |        |               |
| 4.500   | 3.385027 |        |          |        |               |
| 4.600   | 3.034503 |        |          |        |               |
| 4.700   | 2.778437 |        |          |        |               |
| 4.800   | 2.607399 |        |          |        |               |
| 4.900   | 2.515293 |        |          |        |               |
| 5.000   | 2.490662 |        |          |        |               |
| 5.100   | 2.526116 |        |          |        |               |
| 5.200   | 2.601922 |        |          |        |               |
| 5.300   | 2.702026 |        |          |        |               |
| 5.400   | 2.811217 |        |          |        |               |
| 5.500   | 2.923175 |        |          |        |               |
| 5.600   | 3.030826 |        |          |        |               |
| 5.700   | 3.122591 |        |          |        |               |
| 5.800   | 3.206606 |        |          |        |               |
| 5.900   | 3.258114 |        |          |        |               |
| 6.000   | 3.294068 |        |          |        |               |
| 6.100   | 3.299294 |        |          |        |               |
| 6.200   | 3.278760 |        |          |        |               |
| 6.300   | 3.227060 |        |          |        |               |
| 6.400   | 3.154769 |        |          |        |               |
| 6.500   | 3.064404 |        |          |        |               |
| 6.600   | 2.959094 |        |          |        |               |
| 6.700   | 2.853825 |        |          |        |               |
| 6.800   | 2.750452 |        |          |        |               |
| 6.900   | 2.654352 |        |          |        |               |
| 7.000   | 2.571041 |        |          |        |               |
| 7.100   | 2.499077 |        |          |        |               |
| 7.200   | 2.439082 |        |          |        |               |
| 7.300   | 2.396125 |        |          |        |               |
| 7.400   | 2.365112 |        |          |        |               |
| 7.500   | 2.345583 |        |          |        |               |
| 7.600   | 2.335664 |        |          |        |               |
| 7.700   | 2.337650 |        |          |        |               |
| 7.800   | 2.345084 |        |          |        |               |
| 7.900   | 2.356319 |        |          |        |               |
| 8.000   | 2.366136 |        |          |        |               |
| 8.100   | 2.377449 |        |          |        |               |
| 8.200   | 2.380078 |        |          |        |               |
| 8.300   | 2.378185 |        |          |        |               |
| 8.400   | 2.373542 |        |          |        |               |
| 8.500   | 2.356269 |        |          |        |               |
| 8.600   | 2.331781 |        |          |        |               |
| 8.700   | 2.304081 |        |          |        |               |
| 8.800   | 2.269715 |        |          |        |               |
| 8.900   | 2.235916 |        |          |        |               |
| 9.000   | 2.197066 |        |          |        |               |
| 9.100   | 2.158196 |        |          |        |               |

|                 |                  |                   |                       |
|-----------------|------------------|-------------------|-----------------------|
| CLA-POT         | 8.300 -1.966667  | 14.100 -1.017589  | 19.900 -0.3834817     |
| -----           | 8.400 -1.931377  | 14.200 -1.004531  | 20.000 -0.3742450     |
| 2.700 6.337955  | 8.500 -1.899773  | 14.300 -0.9910132 | 20.100 -0.3661624     |
| 2.800 0.3710774 | 8.600 -1.870074  | 14.400 -0.9791088 | 20.200 -0.3574924     |
| 2.900 -2.737820 | 8.700 -1.843009  | 14.500 -0.9653708 | 20.300 -0.3485803     |
| 3.000 -4.146992 | 8.800 -1.820578  | 14.600 -0.9527718 | 20.400 -0.3406650     |
| 3.100 -4.518348 | 8.900 -1.801672  | 14.700 -0.9397108 | 20.500 -0.3328703     |
| 3.200 -4.300492 | 9.000 -1.783914  | 14.800 -0.9274501 | 20.600 -0.3235340     |
| 3.300 -3.796698 | 9.100 -1.767741  | 14.900 -0.9142067 | 20.700 -0.3163532     |
| 3.400 -3.198892 | 9.200 -1.755038  | 15.000 -0.9018748 | 20.800 -0.3075409     |
| 3.500 -2.614916 | 9.300 -1.741485  | 15.100 -0.8890980 | 20.900 -0.3007410     |
| 3.600 -2.119919 | 9.400 -1.728275  | 15.200 -0.8765807 | 21.000 -0.2932486     |
| 3.700 -1.734644 | 9.500 -1.714597  | 15.300 -0.8643159 | 21.100 -0.2853436     |
| 3.800 -1.474104 | 9.600 -1.701753  | 15.400 -0.8527492 | 21.200 -0.2779853     |
| 3.900 -1.333701 | 9.700 -1.688576  | 15.500 -0.8397725 | 21.300 -0.2709601     |
| 4.000 -1.308488 | 9.800 -1.673581  | 15.600 -0.8283775 | 21.400 -0.2640861     |
| 4.100 -1.378979 | 9.900 -1.658183  | 15.700 -0.8151051 | 21.500 -0.2571135     |
| 4.200 -1.521675 | 10.000 -1.641565 | 15.800 -0.8042778 | 21.600 -0.2502700     |
| 4.300 -1.712786 | 10.100 -1.625442 | 15.900 -0.7916217 | 21.700 -0.2432370     |
| 4.400 -1.942513 | 10.200 -1.608971 | 16.000 -0.7808232 | 21.800 -0.2362565     |
| 4.500 -2.176923 | 10.300 -1.592821 | 16.100 -0.7683007 | 21.900 -0.2296859     |
| 4.600 -2.409166 | 10.400 -1.574774 | 16.200 -0.7565440 | 22.000 -0.2230050     |
| 4.700 -2.614968 | 10.500 -1.555717 | 16.300 -0.7450353 | 22.100 -0.2170130     |
| 4.800 -2.791481 | 10.600 -1.537533 | 16.400 -0.7338948 | 22.200 -0.2098240     |
| 4.900 -2.924571 | 10.700 -1.520466 | 16.500 -0.7218185 | 22.300 -0.2034564     |
| 5.000 -3.011676 | 10.800 -1.501770 | 16.600 -0.7110942 | 22.400 -0.1972257     |
| 5.100 -3.053895 | 10.900 -1.484477 | 16.700 -0.7006012 | 22.500 -0.1907997     |
| 5.200 -3.068557 | 11.000 -1.466829 | 16.800 -0.6882932 | 22.600 -0.1847454     |
| 5.300 -3.068665 | 11.100 -1.449766 | 16.900 -0.6780130 | 22.700 -0.1786427     |
| 5.400 -3.060515 | 11.200 -1.434275 | 17.000 -0.6664693 | 22.800 -0.1726075     |
| 5.500 -3.041307 | 11.300 -1.418112 | 17.100 -0.6556785 | 22.900 -0.1674617     |
| 5.600 -2.997465 | 11.400 -1.402661 | 17.200 -0.6453477 | 23.000 -0.1620423     |
| 5.700 -2.920958 | 11.500 -1.386765 | 17.300 -0.6336851 | 23.100 -0.1558188     |
| 5.800 -2.808473 | 11.600 -1.372769 | 17.400 -0.6243188 | 23.200 -0.1504627     |
| 5.900 -2.663390 | 11.700 -1.356718 | 17.500 -0.6138171 | 23.300 -0.1449776     |
| 6.000 -2.501435 | 11.800 -1.343012 | 17.600 -0.6023847 | 23.400 -0.1401701     |
| 6.100 -2.347134 | 11.900 -1.327979 | 17.700 -0.5924962 | 23.500 -0.1351896     |
| 6.200 -2.228174 | 12.000 -1.312751 | 17.800 -0.5815709 | 23.600 -0.1297823     |
| 6.300 -2.143759 | 12.100 -1.299745 | 17.900 -0.5716619 | 23.700 -0.1251816     |
| 6.400 -2.096126 | 12.200 -1.284574 | 18.000 -0.5614031 | 23.800 -0.1202724     |
| 6.500 -2.080194 | 12.300 -1.270939 | 18.100 -0.5513201 | 23.900 -0.1160305     |
| 6.600 -2.084164 | 12.400 -1.256796 | 18.200 -0.5416775 | 24.000 -0.1118483     |
| 6.700 -2.100768 | 12.500 -1.242013 | 18.300 -0.5314383 | 24.100 -0.1076603     |
| 6.800 -2.122368 | 12.600 -1.227257 | 18.400 -0.5213939 | 24.200 -0.1028457     |
| 6.900 -2.141253 | 12.700 -1.213081 | 18.500 -0.5114143 | 24.300 -9.8905034E-02 |
| 7.000 -2.162274 | 12.800 -1.199139 | 18.600 -0.5011057 | 24.400 -9.4553269E-02 |
| 7.100 -2.176395 | 12.900 -1.184489 | 18.700 -0.4928274 | 24.500 -9.0313271E-02 |
| 7.200 -2.187257 | 13.000 -1.169947 | 18.800 -0.4826206 | 24.600 -8.6877160E-02 |
| 7.300 -2.191582 | 13.100 -1.155131 | 18.900 -0.4736856 | 24.700 -8.3441399E-02 |
| 7.400 -2.192336 | 13.200 -1.141595 | 19.000 -0.4642170 | 24.800 -7.9701722E-02 |
| 7.500 -2.184704 | 13.300 -1.127405 | 19.100 -0.4549639 | 24.900 -7.6200105E-02 |
| 7.600 -2.173496 | 13.400 -1.113286 | 19.200 -0.4455427 | 25.000 -7.2680786E-02 |
| 7.700 -2.155466 | 13.500 -1.099310 | 19.300 -0.4367067 |                       |
| 7.800 -2.133093 | 13.600 -1.085105 | 19.400 -0.4276049 |                       |
| 7.900 -2.105658 | 13.700 -1.070785 | 19.500 -0.4189438 |                       |
| 8.000 -2.074299 | 13.800 -1.057425 | 19.600 -0.4102862 |                       |
| 8.100 -2.040844 | 13.900 -1.043690 | 19.700 -0.4012038 |                       |
| 8.200 -2.003543 | 14.000 -1.030376 | 19.800 -0.3916224 |                       |

| CYTO-CLA |          | 9.200  | 1.279447  | 15.000 | 0.8041154 | 20.800 | 0.2967001     |
|----------|----------|--------|-----------|--------|-----------|--------|---------------|
|          | -----    | 9.300  | 1.246219  | 15.100 | 0.7959461 | 20.900 | 0.2882281     |
| 3.600    | 7.862574 | 9.400  | 1.230520  | 15.200 | 0.7803453 | 21.000 | 0.2761119     |
| 3.700    | 6.706264 | 9.500  | 1.199146  | 15.300 | 0.7828344 | 21.100 | 0.2748619     |
| 3.800    | 6.543756 | 9.600  | 1.196977  | 15.400 | 0.7649609 | 21.200 | 0.2600134     |
| 3.900    | 6.074289 | 9.700  | 1.182624  | 15.500 | 0.7592399 | 21.300 | 0.2489827     |
| 4.000    | 5.817484 | 9.800  | 1.153954  | 15.600 | 0.7587294 | 21.400 | 0.2470414     |
| 4.100    | 5.363023 | 9.900  | 1.140068  | 15.700 | 0.7510493 | 21.500 | 0.2423953     |
| 4.200    | 5.538754 | 10.000 | 1.129917  | 15.800 | 0.7436054 | 21.600 | 0.2289830     |
| 4.300    | 4.995117 | 10.100 | 1.124150  | 15.900 | 0.7348812 | 21.700 | 0.2273401     |
| 4.400    | 4.929816 | 10.200 | 1.091948  | 16.000 | 0.7337528 | 21.800 | 0.2156185     |
| 4.500    | 4.603577 | 10.300 | 1.096032  | 16.100 | 0.7138227 | 21.900 | 0.2101727     |
| 4.600    | 3.959480 | 10.400 | 1.096606  | 16.200 | 0.7128872 | 22.000 | 0.2093650     |
| 4.700    | 3.353814 | 10.500 | 1.069253  | 16.300 | 0.6946111 | 22.100 | 0.1996410     |
| 4.800    | 2.606452 | 10.600 | 1.062453  | 16.400 | 0.6809480 | 22.200 | 0.1915957     |
| 4.900    | 2.099245 | 10.700 | 1.053329  | 16.500 | 0.6798558 | 22.300 | 0.1866628     |
| 5.000    | 1.762671 | 10.800 | 1.062190  | 16.600 | 0.6726800 | 22.400 | 0.1789578     |
| 5.100    | 1.570003 | 10.900 | 1.045362  | 16.700 | 0.6629720 | 22.500 | 0.1734269     |
| 5.200    | 1.537488 | 11.000 | 1.050820  | 16.800 | 0.6535667 | 22.600 | 0.1665427     |
| 5.300    | 1.631763 | 11.100 | 1.042977  | 16.900 | 0.6476848 | 22.700 | 0.1654298     |
| 5.400    | 1.695211 | 11.200 | 1.042469  | 17.000 | 0.6348497 | 22.800 | 0.1585542     |
| 5.500    | 1.720785 | 11.300 | 1.040134  | 17.100 | 0.6242123 | 22.900 | 0.1522872     |
| 5.600    | 1.769481 | 11.400 | 1.036746  | 17.200 | 0.6230302 | 23.000 | 0.1413172     |
| 5.700    | 1.729861 | 11.500 | 1.036696  | 17.300 | 0.6119012 | 23.100 | 0.1362113     |
| 5.800    | 1.662241 | 11.600 | 1.031773  | 17.400 | 0.5998997 | 23.200 | 0.1341552     |
| 5.900    | 1.619656 | 11.700 | 1.032203  | 17.500 | 0.5888180 | 23.300 | 0.1310569     |
| 6.000    | 1.576662 | 11.800 | 1.039567  | 17.600 | 0.5803417 | 23.400 | 0.1203850     |
| 6.100    | 1.567756 | 11.900 | 1.027598  | 17.700 | 0.5703626 | 23.500 | 0.1169200     |
| 6.200    | 1.572648 | 12.000 | 1.014548  | 17.800 | 0.5630827 | 23.600 | 0.1111998     |
| 6.300    | 1.568144 | 12.100 | 1.014733  | 17.900 | 0.5489615 | 23.700 | 0.1102998     |
| 6.400    | 1.555696 | 12.200 | 1.004923  | 18.000 | 0.5421569 | 23.800 | 0.1059449     |
| 6.500    | 1.502284 | 12.300 | 0.9941324 | 18.100 | 0.5337905 | 23.900 | 9.8900497E-02 |
| 6.600    | 1.501895 | 12.400 | 0.9897761 | 18.200 | 0.5245286 | 24.000 | 9.8513640E-02 |
| 6.700    | 1.450940 | 12.500 | 0.9860037 | 18.300 | 0.5105466 | 24.100 | 9.3633763E-02 |
| 6.800    | 1.420456 | 12.600 | 0.9596307 | 18.400 | 0.5056916 | 24.200 | 8.7186001E-02 |
| 6.900    | 1.407233 | 12.700 | 0.9600124 | 18.500 | 0.4989117 | 24.300 | 8.2754262E-02 |
| 7.000    | 1.419172 | 12.800 | 0.9597363 | 18.600 | 0.4854625 | 24.400 | 8.0513790E-02 |
| 7.100    | 1.429467 | 12.900 | 0.9448663 | 18.700 | 0.4708631 | 24.500 | 7.7264175E-02 |
| 7.200    | 1.442425 | 13.000 | 0.9315763 | 18.800 | 0.4703552 | 24.600 | 7.2947085E-02 |
| 7.300    | 1.449511 | 13.100 | 0.9250504 | 18.900 | 0.4609901 | 24.700 | 6.9519587E-02 |
| 7.400    | 1.446115 | 13.200 | 0.9287977 | 19.000 | 0.4510528 | 24.800 | 6.7717813E-02 |
| 7.500    | 1.430058 | 13.300 | 0.9131121 | 19.100 | 0.4445450 | 24.900 | 5.6182917E-02 |
| 7.600    | 1.410780 | 13.400 | 0.9074811 | 19.200 | 0.4405432 | 25.000 | 5.7635177E-02 |
| 7.700    | 1.397966 | 13.500 | 0.9007557 | 19.300 | 0.4268042 |        |               |
| 7.800    | 1.379224 | 13.600 | 0.8809388 | 19.400 | 0.4180706 |        |               |
| 7.900    | 1.349315 | 13.700 | 0.8993941 | 19.500 | 0.4049796 |        |               |
| 8.000    | 1.338660 | 13.800 | 0.8846434 | 19.600 | 0.3981947 |        |               |
| 8.100    | 1.344320 | 13.900 | 0.8740817 | 19.700 | 0.3908506 |        |               |
| 8.200    | 1.343817 | 14.000 | 0.8724108 | 19.800 | 0.3804061 |        |               |
| 8.300    | 1.326522 | 14.100 | 0.8637002 | 19.900 | 0.3702354 |        |               |
| 8.400    | 1.349057 | 14.200 | 0.8568545 | 20.000 | 0.3680347 |        |               |
| 8.500    | 1.313318 | 14.300 | 0.8511770 | 20.100 | 0.3570272 |        |               |
| 8.600    | 1.316576 | 14.400 | 0.8474694 | 20.200 | 0.3541452 |        |               |
| 8.700    | 1.317887 | 14.500 | 0.8450313 | 20.300 | 0.3483310 |        |               |
| 8.800    | 1.316843 | 14.600 | 0.8257715 | 20.400 | 0.3402551 |        |               |
| 8.900    | 1.303801 | 14.700 | 0.8273833 | 20.500 | 0.3220373 |        |               |
| 9.000    | 1.311344 | 14.800 | 0.8167915 | 20.600 | 0.3161476 |        |               |
| 9.100    | 1.274259 | 14.900 | 0.8133039 | 20.700 | 0.3043716 |        |               |

|                     |                   |                   |                       |
|---------------------|-------------------|-------------------|-----------------------|
| CYTO-POT            | 8.800 -0.9072649  | 14.600 -0.5569070 | 20.400 -0.1525795     |
| -----               | 8.900 -0.8944578  | 14.700 -0.5462469 | 20.500 -0.1409200     |
| 3.200 4.304556      | 9.000 -0.8631284  | 14.800 -0.5491032 | 20.600 -0.1472094     |
| 3.300 3.595299      | 9.100 -0.8459532  | 14.900 -0.5418004 | 20.700 -0.1390400     |
| 3.400 1.800663      | 9.200 -0.8293183  | 15.000 -0.5483711 | 20.800 -0.1317201     |
| 3.500 0.9952936     | 9.300 -0.8093277  | 15.100 -0.5434446 | 20.900 -0.1267715     |
| 3.600 5.2390274E-02 | 9.400 -0.8107265  | 15.200 -0.5413789 | 21.000 -0.1307019     |
| 3.700 -0.4948831    | 9.500 -0.8070472  | 15.300 -0.5255627 | 21.100 -0.1206369     |
| 3.800 -0.6646459    | 9.600 -0.8105575  | 15.400 -0.5051115 | 21.200 -0.1262612     |
| 3.900 -0.5542585    | 9.700 -0.8187255  | 15.500 -0.4890963 | 21.300 -0.1152354     |
| 4.000 -0.4407318    | 9.800 -0.8360574  | 15.600 -0.4810876 | 21.400 -0.1151916     |
| 4.100 -0.6480532    | 9.900 -0.8462811  | 15.700 -0.4719335 | 21.500 -0.1105881     |
| 4.200 -1.069550     | 10.000 -0.8502612 | 15.800 -0.4601562 | 21.600 -0.1004651     |
| 4.300 -1.384475     | 10.100 -0.8540512 | 15.900 -0.4522054 | 21.700 -9.2353262E-02 |
| 4.400 -1.566310     | 10.200 -0.8572067 | 16.000 -0.4448874 | 21.800 -8.9003026E-02 |
| 4.500 -1.522833     | 10.300 -0.8402873 | 16.100 -0.4308985 | 21.900 -9.0830378E-02 |
| 4.600 -1.489829     | 10.400 -0.8426976 | 16.200 -0.4215476 | 22.000 -8.5393235E-02 |
| 4.700 -1.659188     | 10.500 -0.8254814 | 16.300 -0.4080248 | 22.100 -8.6332083E-02 |
| 4.800 -2.084757     | 10.600 -0.8270588 | 16.400 -0.3972170 | 22.200 -7.7894166E-02 |
| 4.900 -2.631891     | 10.700 -0.8283697 | 16.500 -0.3925966 | 22.300 -7.6983400E-02 |
| 5.000 -2.978828     | 10.800 -0.8399360 | 16.600 -0.3817300 | 22.400 -7.7435859E-02 |
| 5.100 -2.957251     | 10.900 -0.8805267 | 16.700 -0.3903786 | 22.500 -6.3144483E-02 |
| 5.200 -2.644109     | 11.000 -0.8995174 | 16.800 -0.3778654 | 22.600 -6.6609234E-02 |
| 5.300 -2.214185     | 11.100 -0.8948973 | 16.900 -0.3657923 | 22.700 -6.5588564E-02 |
| 5.400 -1.831894     | 11.200 -0.8790558 | 17.000 -0.3610031 | 22.800 -6.1529160E-02 |
| 5.500 -1.559330     | 11.300 -0.8685978 | 17.100 -0.3464805 | 22.900 -6.8304561E-02 |
| 5.600 -1.351056     | 11.400 -0.8304882 | 17.200 -0.3421333 | 23.000 -6.1858993E-02 |
| 5.700 -1.252288     | 11.500 -0.7959360 | 17.300 -0.3342764 | 23.100 -6.1265852E-02 |
| 5.800 -1.223922     | 11.600 -0.7726731 | 17.400 -0.3151243 | 23.200 -5.8431037E-02 |
| 5.900 -1.231962     | 11.700 -0.7435052 | 17.500 -0.3151653 | 23.300 -5.5736579E-02 |
| 6.000 -1.331131     | 11.800 -0.7321309 | 17.600 -0.3142304 | 23.400 -5.2075926E-02 |
| 6.100 -1.455278     | 11.900 -0.7283009 | 17.700 -0.2989646 | 23.500 -5.0565638E-02 |
| 6.200 -1.557767     | 12.000 -0.7110810 | 17.800 -0.2879557 | 23.600 -4.3459889E-02 |
| 6.300 -1.574658     | 12.100 -0.6918158 | 17.900 -0.2852909 | 23.700 -4.6054333E-02 |
| 6.400 -1.568278     | 12.200 -0.6913509 | 18.000 -0.2869647 | 23.800 -4.1404489E-02 |
| 6.500 -1.478720     | 12.300 -0.6877724 | 18.100 -0.2749855 | 23.900 -4.8367806E-02 |
| 6.600 -1.407124     | 12.400 -0.6727679 | 18.200 -0.2664404 | 24.000 -4.7707662E-02 |
| 6.700 -1.315776     | 12.500 -0.6731285 | 18.300 -0.2642253 | 24.100 -4.4717096E-02 |
| 6.800 -1.233799     | 12.600 -0.6671027 | 18.400 -0.2666723 | 24.200 -3.4918830E-02 |
| 6.900 -1.174264     | 12.700 -0.6583017 | 18.500 -0.2508080 | 24.300 -3.1294145E-02 |
| 7.000 -1.122914     | 12.800 -0.6644354 | 18.600 -0.2521667 | 24.400 -2.5747413E-02 |
| 7.100 -1.087047     | 12.900 -0.6605157 | 18.700 -0.2456803 | 24.500 -1.9256640E-02 |
| 7.200 -1.055972     | 13.000 -0.6428301 | 18.800 -0.2328745 | 24.600 -2.4911275E-02 |
| 7.300 -1.015336     | 13.100 -0.6450874 | 18.900 -0.2288219 | 24.700 -1.9515842E-02 |
| 7.400 -1.016916     | 13.200 -0.6369702 | 19.000 -0.2271149 | 24.800 -1.9430352E-02 |
| 7.500 -1.007384     | 13.300 -0.6252164 | 19.100 -0.2169867 | 24.900 -2.3234205E-02 |
| 7.600 -0.9897230    | 13.400 -0.6278630 | 19.200 -0.2173442 | 25.000 -2.0619210E-02 |
| 7.700 -1.006324     | 13.500 -0.6145157 | 19.300 -0.2127559 |                       |
| 7.800 -0.9884951    | 13.600 -0.6115137 | 19.400 -0.2049411 |                       |
| 7.900 -0.9907191    | 13.700 -0.5995219 | 19.500 -0.1987537 |                       |
| 8.000 -0.9519742    | 13.800 -0.6046689 | 19.600 -0.1981757 |                       |
| 8.100 -0.9249185    | 13.900 -0.5888391 | 19.700 -0.1869785 |                       |
| 8.200 -0.9240087    | 14.000 -0.5870734 | 19.800 -0.1785484 |                       |
| 8.300 -0.9033432    | 14.100 -0.5713316 | 19.900 -0.1766464 |                       |
| 8.400 -0.9155454    | 14.200 -0.5698627 | 20.000 -0.1723341 |                       |
| 8.500 -0.9113389    | 14.300 -0.5680030 | 20.100 -0.1662715 |                       |
| 8.600 -0.9302619    | 14.400 -0.5719067 | 20.200 -0.1570839 |                       |
| 8.700 -0.9208941    | 14.500 -0.5583712 | 20.300 -0.1517564 |                       |

|                  |                   |                   |                       |
|------------------|-------------------|-------------------|-----------------------|
| GUAN-CLA         | 9.000 -1.082833   | 14.800 -0.6220384 | 20.600 -0.1762141     |
| -----            | 9.100 -1.051158   | 14.900 -0.6198572 | 20.700 -0.1746524     |
| 3.400 2.887540   | 9.200 -1.046866   | 15.000 -0.6122538 | 20.800 -0.1717067     |
| 3.500 2.219450   | 9.300 -1.022602   | 15.100 -0.5987626 | 20.900 -0.1636307     |
| 3.600 1.673028   | 9.400 -1.011892   | 15.200 -0.5979694 | 21.000 -0.1621038     |
| 3.700 1.036906   | 9.500 -1.009705   | 15.300 -0.5878311 | 21.100 -0.1512665     |
| 3.800 0.9029828  | 9.600 -1.001544   | 15.400 -0.5796399 | 21.200 -0.1465127     |
| 3.900 0.8915206  | 9.700 -0.9806991  | 15.500 -0.5806438 | 21.300 -0.1406256     |
| 4.000 0.9408709  | 9.800 -0.9868167  | 15.600 -0.5588776 | 21.400 -0.1349385     |
| 4.100 0.7780842  | 9.900 -0.9507513  | 15.700 -0.5601121 | 21.500 -0.1220854     |
| 4.200 0.7123142  | 10.000 -0.9621792 | 15.800 -0.5436331 | 21.600 -0.1214678     |
| 4.300 0.7267743  | 10.100 -0.9689975 | 15.900 -0.5359896 | 21.700 -0.1192748     |
| 4.400 0.5194978  | 10.200 -0.9517516 | 16.000 -0.5225397 | 21.800 -0.1108901     |
| 4.500 0.6570453  | 10.300 -0.9404488 | 16.100 -0.5234718 | 21.900 -0.1078767     |
| 4.600 0.2324817  | 10.400 -0.9433368 | 16.200 -0.5203891 | 22.000 -9.8705590E-02 |
| 4.700 -0.5271352 | 10.500 -0.9466280 | 16.300 -0.5097697 | 22.100 -9.2783839E-02 |
| 4.800 -1.662664  | 10.600 -0.9418501 | 16.400 -0.5051472 | 22.200 -8.6458057E-02 |
| 4.900 -2.639628  | 10.700 -0.9189971 | 16.500 -0.5001861 | 22.300 -8.4209196E-02 |
| 5.000 -3.067840  | 10.800 -0.9119598 | 16.600 -0.4997144 | 22.400 -7.5776488E-02 |
| 5.100 -3.078622  | 10.900 -0.9034684 | 16.700 -0.4892019 | 22.500 -7.4268326E-02 |
| 5.200 -2.800623  | 11.000 -0.8898201 | 16.800 -0.4794179 | 22.600 -6.6699043E-02 |
| 5.300 -2.470659  | 11.100 -0.8881104 | 16.900 -0.4730842 | 22.700 -6.1969057E-02 |
| 5.400 -2.150704  | 11.200 -0.8697652 | 17.000 -0.4683502 | 22.800 -6.5351874E-02 |
| 5.500 -1.928541  | 11.300 -0.8636563 | 17.100 -0.4694881 | 22.900 -5.5937745E-02 |
| 5.600 -1.817907  | 11.400 -0.8534088 | 17.200 -0.4610189 | 23.000 -4.9086843E-02 |
| 5.700 -1.744059  | 11.500 -0.8409733 | 17.300 -0.4473282 | 23.100 -4.6079531E-02 |
| 5.800 -1.699537  | 11.600 -0.8224897 | 17.400 -0.4421324 | 23.200 -4.7656450E-02 |
| 5.900 -1.631752  | 11.700 -0.8272610 | 17.500 -0.4409960 | 23.300 -3.9231781E-02 |
| 6.000 -1.570511  | 11.800 -0.8068052 | 17.600 -0.4365166 | 23.400 -3.8093276E-02 |
| 6.100 -1.471979  | 11.900 -0.7898318 | 17.700 -0.4260152 | 23.500 -4.1054592E-02 |
| 6.200 -1.400113  | 12.000 -0.7895036 | 17.800 -0.4085473 | 23.600 -3.2256886E-02 |
| 6.300 -1.382839  | 12.100 -0.7830824 | 17.900 -0.4061285 | 23.700 -3.1679392E-02 |
| 6.400 -1.354550  | 12.200 -0.7804998 | 18.000 -0.3856624 | 23.800 -2.8396484E-02 |
| 6.500 -1.318579  | 12.300 -0.7708539 | 18.100 -0.3762155 | 23.900 -2.5729286E-02 |
| 6.600 -1.332506  | 12.400 -0.7748392 | 18.200 -0.3707563 | 24.000 -2.5784899E-02 |
| 6.700 -1.359362  | 12.500 -0.7654316 | 18.300 -0.3650846 | 24.100 -1.7295010E-02 |
| 6.800 -1.408259  | 12.600 -0.7629303 | 18.400 -0.3449372 | 24.200 -1.8314430E-02 |
| 6.900 -1.428299  | 12.700 -0.7627367 | 18.500 -0.3448194 | 24.300 -2.1357752E-02 |
| 7.000 -1.430567  | 12.800 -0.7549506 | 18.600 -0.3327719 | 24.400 -1.6192237E-02 |
| 7.100 -1.454374  | 12.900 -0.7509663 | 18.700 -0.3259583 | 24.500 -1.7088113E-02 |
| 7.200 -1.436873  | 13.000 -0.7356477 | 18.800 -0.3147508 | 24.600 -7.9062581E-03 |
| 7.300 -1.435096  | 13.100 -0.7530308 | 18.900 -0.3054832 | 24.700 -1.1000088E-02 |
| 7.400 -1.420374  | 13.200 -0.7464849 | 19.000 -0.3009718 | 24.800 -6.6011767E-03 |
| 7.500 -1.392759  | 13.300 -0.7298750 | 19.100 -0.2931113 | 24.900 -1.0421725E-02 |
| 7.600 -1.355069  | 13.400 -0.7255607 | 19.200 -0.2872077 | 25.000 -6.4199641E-03 |
| 7.700 -1.324179  | 13.500 -0.7144352 | 19.300 -0.2799332 |                       |
| 7.800 -1.288259  | 13.600 -0.7098340 | 19.400 -0.2692752 |                       |
| 7.900 -1.266026  | 13.700 -0.6980981 | 19.500 -0.2558981 |                       |
| 8.000 -1.265460  | 13.800 -0.6937314 | 19.600 -0.2505539 |                       |
| 8.100 -1.224513  | 13.900 -0.6924185 | 19.700 -0.2423093 |                       |
| 8.200 -1.206625  | 14.000 -0.6834270 | 19.800 -0.2329670 |                       |
| 8.300 -1.187030  | 14.100 -0.6692687 | 19.900 -0.2303280 |                       |
| 8.400 -1.174785  | 14.200 -0.6713055 | 20.000 -0.2202289 |                       |
| 8.500 -1.152078  | 14.300 -0.6606476 | 20.100 -0.2208717 |                       |
| 8.600 -1.124790  | 14.400 -0.6545997 | 20.200 -0.2054633 |                       |
| 8.700 -1.139527  | 14.500 -0.6522040 | 20.300 -0.2046434 |                       |
| 8.800 -1.094697  | 14.600 -0.6434750 | 20.400 -0.1891169 |                       |
| 8.900 -1.081353  | 14.700 -0.6368696 | 20.500 -0.1861892 |                       |

|                      |                  |                       |                       |
|----------------------|------------------|-----------------------|-----------------------|
| GUAN-POT             | 9.000 0.4550920  | 14.800 0.1700054      | 20.600 -7.6970406E-02 |
| -----                | 9.100 0.4292670  | 14.900 0.1642721      | 20.700 -7.0997134E-02 |
| 3.400 8.631298       | 9.200 0.4073632  | 15.000 0.1565774      | 20.800 -7.0432074E-02 |
| 3.500 6.660685       | 9.300 0.4060869  | 15.100 0.1476258      | 20.900 -7.1476586E-02 |
| 3.600 5.573242       | 9.400 0.3917895  | 15.200 0.1331789      | 21.000 -7.7277459E-02 |
| 3.700 3.547083       | 9.500 0.3603335  | 15.300 0.1313820      | 21.100 -8.0327176E-02 |
| 3.800 2.108288       | 9.600 0.3105704  | 15.400 0.1275384      | 21.200 -8.1400722E-02 |
| 3.900 0.9708715      | 9.700 0.2685206  | 15.500 0.1230483      | 21.300 -7.3811486E-02 |
| 4.000 0.2382713      | 9.800 0.2460553  | 15.600 0.1145438      | 21.400 -7.6516539E-02 |
| 4.100 -0.1343315     | 9.900 0.2152209  | 15.700 0.1039230      | 21.500 -7.4223973E-02 |
| 4.200 -0.2232451     | 10.000 0.2042514 | 15.800 9.7329028E-02  | 21.600 -7.5280130E-02 |
| 4.300 -6.6097751E-02 | 10.100 0.1947854 | 15.900 9.7078823E-02  | 21.700 -7.6652654E-02 |
| 4.400 0.2449283      | 10.200 0.2131894 | 16.000 8.9862593E-02  | 21.800 -7.9592854E-02 |
| 4.500 0.6067995      | 10.300 0.2112802 | 16.100 8.3931804E-02  | 21.900 -8.2531080E-02 |
| 4.600 0.9085447      | 10.400 0.2249115 | 16.200 8.9077704E-02  | 22.000 -7.6559566E-02 |
| 4.700 1.096709       | 10.500 0.2369416 | 16.300 8.7104812E-02  | 22.100 -8.0703616E-02 |
| 4.800 1.096282       | 10.600 0.2401601 | 16.400 8.4969051E-02  | 22.200 -8.1647225E-02 |
| 4.900 0.9760475      | 10.700 0.2420399 | 16.500 6.8912208E-02  | 22.300 -8.1204571E-02 |
| 5.000 0.8189952      | 10.800 0.2437532 | 16.600 6.4730227E-02  | 22.400 -7.4556269E-02 |
| 5.100 0.6864787      | 10.900 0.2435366 | 16.700 6.5810964E-02  | 22.500 -7.6021187E-02 |
| 5.200 0.6312110      | 11.000 0.2372829 | 16.800 5.7396494E-02  | 22.600 -7.1904734E-02 |
| 5.300 0.7428013      | 11.100 0.2319277 | 16.900 5.5311933E-02  | 22.700 -6.4899817E-02 |
| 5.400 0.9781870      | 11.200 0.2143472 | 17.000 4.6502441E-02  | 22.800 -6.6466846E-02 |
| 5.500 1.302930       | 11.300 0.2107655 | 17.100 3.3398379E-02  | 22.900 -6.0034622E-02 |
| 5.600 1.517083       | 11.400 0.1895240 | 17.200 2.6033204E-02  | 23.000 -5.9122965E-02 |
| 5.700 1.642004       | 11.500 0.1895661 | 17.300 1.7148437E-02  | 23.100 -6.2633023E-02 |
| 5.800 1.644830       | 11.600 0.1688984 | 17.400 9.3171345E-03  | 23.200 -5.6602981E-02 |
| 5.900 1.499948       | 11.700 0.1740937 | 17.500 2.6895895E-03  | 23.300 -5.8843393E-02 |
| 6.000 1.349627       | 11.800 0.1805643 | 17.600 -6.2271790E-03 | 23.400 -5.5045694E-02 |
| 6.100 1.205548       | 11.900 0.1794746 | 17.700 -1.4898678E-02 | 23.500 -4.9934622E-02 |
| 6.200 1.070790       | 12.000 0.1853028 | 17.800 -1.8925862E-02 | 23.600 -5.0987303E-02 |
| 6.300 0.9286664      | 12.100 0.1810753 | 17.900 -2.1356521E-02 | 23.700 -5.8927152E-02 |
| 6.400 0.8293175      | 12.200 0.1914730 | 18.000 -2.2512270E-02 | 23.800 -5.9074841E-02 |
| 6.500 0.7348549      | 12.300 0.1832515 | 18.100 -2.0011088E-02 | 23.900 -6.5244615E-02 |
| 6.600 0.6608334      | 12.400 0.1751542 | 18.200 -1.9149834E-02 | 24.000 -6.4802557E-02 |
| 6.700 0.6185597      | 12.500 0.1837947 | 18.300 -2.4220381E-02 | 24.100 -7.2019666E-02 |
| 6.800 0.5631590      | 12.600 0.1869470 | 18.400 -2.7912095E-02 | 24.200 -7.5392544E-02 |
| 6.900 0.5893351      | 12.700 0.2021796 | 18.500 -3.1325676E-02 | 24.300 -7.2796106E-02 |
| 7.000 0.6031001      | 12.800 0.2141623 | 18.600 -3.5674654E-02 | 24.400 -6.4819939E-02 |
| 7.100 0.6070004      | 12.900 0.2274116 | 18.700 -3.5596579E-02 | 24.500 -6.1255954E-02 |
| 7.200 0.6235102      | 13.000 0.2348280 | 18.800 -3.7007648E-02 | 24.600 -5.1913977E-02 |
| 7.300 0.6420528      | 13.100 0.2328736 | 18.900 -4.1101135E-02 | 24.700 -5.1024638E-02 |
| 7.400 0.6446708      | 13.200 0.2277222 | 19.000 -3.9606299E-02 | 24.800 -4.4476096E-02 |
| 7.500 0.6281475      | 13.300 0.2401756 | 19.100 -3.7802257E-02 | 24.900 -4.2347122E-02 |
| 7.600 0.5962119      | 13.400 0.2290894 | 19.200 -5.3645127E-02 | 25.000 -4.0236432E-02 |
| 7.700 0.5303312      | 13.500 0.2386276 | 19.300 -4.0572342E-02 |                       |
| 7.800 0.4614032      | 13.600 0.2308288 | 19.400 -4.3469492E-02 |                       |
| 7.900 0.3875633      | 13.700 0.2190237 | 19.500 -4.4116899E-02 |                       |
| 8.000 0.3550551      | 13.800 0.2220107 | 19.600 -4.2462315E-02 |                       |
| 8.100 0.3668351      | 13.900 0.2245745 | 19.700 -4.5075193E-02 |                       |
| 8.200 0.4430176      | 14.000 0.2122661 | 19.800 -4.8726123E-02 |                       |
| 8.300 0.5072039      | 14.100 0.1957918 | 19.900 -5.1739395E-02 |                       |
| 8.400 0.5777308      | 14.200 0.1901530 | 20.000 -6.4823858E-02 |                       |
| 8.500 0.6028294      | 14.300 0.1889481 | 20.100 -5.7342336E-02 |                       |
| 8.600 0.5940523      | 14.400 0.1727743 | 20.200 -6.4464614E-02 |                       |
| 8.700 0.5460909      | 14.500 0.1799795 | 20.300 -7.6559946E-02 |                       |
| 8.800 0.5046743      | 14.600 0.1760353 | 20.400 -7.3835671E-02 |                       |
| 8.900 0.4576762      | 14.700 0.1738664 | 20.500 -7.6019600E-02 |                       |

| PHO-CLA |          | 9.600  | 2.353261 | 15.400 | 1.242194  | 21.200 | 0.4933921 |
|---------|----------|--------|----------|--------|-----------|--------|-----------|
| -----   |          | 9.700  | 2.325490 | 15.500 | 1.224791  | 21.300 | 0.4838217 |
| 4.000   | 10.18900 | 9.800  | 2.285092 | 15.600 | 1.209785  | 21.400 | 0.4701699 |
| 4.100   | 8.175538 | 9.900  | 2.249179 | 15.700 | 1.193974  | 21.500 | 0.4596207 |
| 4.200   | 7.481567 | 10.000 | 2.219731 | 15.800 | 1.175889  | 21.600 | 0.4469470 |
| 4.300   | 6.673812 | 10.100 | 2.202783 | 15.900 | 1.165070  | 21.700 | 0.4401130 |
| 4.400   | 5.995517 | 10.200 | 2.172930 | 16.000 | 1.152516  | 21.800 | 0.4287858 |
| 4.500   | 5.405921 | 10.300 | 2.151095 | 16.100 | 1.132820  | 21.900 | 0.4218275 |
| 4.600   | 4.822627 | 10.400 | 2.128923 | 16.200 | 1.119674  | 22.000 | 0.4111047 |
| 4.700   | 4.401179 | 10.500 | 2.103962 | 16.300 | 1.108940  | 22.100 | 0.3984455 |
| 4.800   | 4.023885 | 10.600 | 2.080360 | 16.400 | 1.088203  | 22.200 | 0.3905528 |
| 4.900   | 3.721831 | 10.700 | 2.073717 | 16.500 | 1.077170  | 22.300 | 0.3818740 |
| 5.000   | 3.523863 | 10.800 | 2.037229 | 16.600 | 1.061216  | 22.400 | 0.3700829 |
| 5.100   | 3.305856 | 10.900 | 2.014602 | 16.700 | 1.043487  | 22.500 | 0.3599882 |
| 5.200   | 3.155796 | 11.000 | 1.994089 | 16.800 | 1.029716  | 22.600 | 0.3506767 |
| 5.300   | 3.006107 | 11.100 | 1.971306 | 16.900 | 1.011975  | 22.700 | 0.3427012 |
| 5.400   | 2.900957 | 11.200 | 1.953502 | 17.000 | 1.000333  | 22.800 | 0.3320892 |
| 5.500   | 2.768676 | 11.300 | 1.935051 | 17.100 | 0.9870912 | 22.900 | 0.3266084 |
| 5.600   | 2.687183 | 11.400 | 1.917985 | 17.200 | 0.9733678 | 23.000 | 0.3142458 |
| 5.700   | 2.645408 | 11.500 | 1.903792 | 17.300 | 0.9631725 | 23.100 | 0.3096161 |
| 5.800   | 2.619056 | 11.600 | 1.885419 | 17.400 | 0.9492660 | 23.200 | 0.2989378 |
| 5.900   | 2.658194 | 11.700 | 1.859616 | 17.500 | 0.9335848 | 23.300 | 0.2876131 |
| 6.000   | 2.737631 | 11.800 | 1.844253 | 17.600 | 0.9187059 | 23.400 | 0.2831684 |
| 6.100   | 2.849566 | 11.900 | 1.829678 | 17.700 | 0.9090717 | 23.500 | 0.2782459 |
| 6.200   | 2.928193 | 12.000 | 1.812799 | 17.800 | 0.8950289 | 23.600 | 0.2672865 |
| 6.300   | 3.020028 | 12.100 | 1.797147 | 17.900 | 0.8834240 | 23.700 | 0.2596228 |
| 6.400   | 3.116430 | 12.200 | 1.775246 | 18.000 | 0.8708255 | 23.800 | 0.2521881 |
| 6.500   | 3.180060 | 12.300 | 1.750208 | 18.100 | 0.8604872 | 23.900 | 0.2477318 |
| 6.600   | 3.226828 | 12.400 | 1.736838 | 18.200 | 0.8494087 | 24.000 | 0.2406421 |
| 6.700   | 3.246129 | 12.500 | 1.709934 | 18.300 | 0.8346580 | 24.100 | 0.2306896 |
| 6.800   | 3.263279 | 12.600 | 1.701842 | 18.400 | 0.8243757 | 24.200 | 0.2253435 |
| 6.900   | 3.225154 | 12.700 | 1.687946 | 18.500 | 0.8118526 | 24.300 | 0.2152685 |
| 7.000   | 3.189039 | 12.800 | 1.670827 | 18.600 | 0.7990310 | 24.400 | 0.2093497 |
| 7.100   | 3.122920 | 12.900 | 1.644897 | 18.700 | 0.7876346 | 24.500 | 0.2043774 |
| 7.200   | 3.013368 | 13.000 | 1.635247 | 18.800 | 0.7764964 | 24.600 | 0.1986910 |
| 7.300   | 2.950267 | 13.100 | 1.618405 | 18.900 | 0.7656204 | 24.700 | 0.1899047 |
| 7.400   | 2.846696 | 13.200 | 1.597153 | 19.000 | 0.7522450 | 24.800 | 0.1811739 |
| 7.500   | 2.780964 | 13.300 | 1.582257 | 19.100 | 0.7437227 | 24.900 | 0.1765852 |
| 7.600   | 2.705317 | 13.400 | 1.564558 | 19.200 | 0.7304069 | 25.000 | 0.1689884 |
| 7.700   | 2.636957 | 13.500 | 1.544102 | 19.300 | 0.7184623 |        |           |
| 7.800   | 2.573495 | 13.600 | 1.525151 | 19.400 | 0.7051002 |        |           |
| 7.900   | 2.555645 | 13.700 | 1.507402 | 19.500 | 0.6981596 |        |           |
| 8.000   | 2.527929 | 13.800 | 1.485744 | 19.600 | 0.6838754 |        |           |
| 8.100   | 2.505398 | 13.900 | 1.475484 | 19.700 | 0.6675359 |        |           |
| 8.200   | 2.481374 | 14.000 | 1.457333 | 19.800 | 0.6589281 |        |           |
| 8.300   | 2.492671 | 14.100 | 1.438327 | 19.900 | 0.6435189 |        |           |
| 8.400   | 2.490576 | 14.200 | 1.417720 | 20.000 | 0.6348157 |        |           |
| 8.500   | 2.497874 | 14.300 | 1.403211 | 20.100 | 0.6220738 |        |           |
| 8.600   | 2.503723 | 14.400 | 1.385005 | 20.200 | 0.6124391 |        |           |
| 8.700   | 2.498893 | 14.500 | 1.371801 | 20.300 | 0.5964865 |        |           |
| 8.800   | 2.500139 | 14.600 | 1.353249 | 20.400 | 0.5892069 |        |           |
| 8.900   | 2.516849 | 14.700 | 1.338087 | 20.500 | 0.5718664 |        |           |
| 9.000   | 2.507662 | 14.800 | 1.322697 | 20.600 | 0.5635312 |        |           |
| 9.100   | 2.493610 | 14.900 | 1.310510 | 20.700 | 0.5534467 |        |           |
| 9.200   | 2.472885 | 15.000 | 1.295240 | 20.800 | 0.5359028 |        |           |
| 9.300   | 2.458842 | 15.100 | 1.280333 | 20.900 | 0.5304009 |        |           |
| 9.400   | 2.423952 | 15.200 | 1.266823 | 21.000 | 0.5198684 |        |           |
| 9.500   | 2.386192 | 15.300 | 1.253808 | 21.100 | 0.5076390 |        |           |

| PHO-POT |            |        |                |
|---------|------------|--------|----------------|
| -----   |            |        |                |
| 3.100   | 4.639314   | 8.700  | -2.250080      |
| 3.200   | 1.777137   | 8.800  | -2.219523      |
| 3.300   | -0.1512945 | 8.900  | -2.194348      |
| 3.400   | -1.291545  | 9.000  | -2.175803      |
| 3.500   | -1.947310  | 9.100  | -2.154500      |
| 3.600   | -2.375999  | 9.200  | -2.141800      |
| 3.700   | -2.713998  | 9.300  | -2.110531      |
| 3.800   | -2.961220  | 9.400  | -2.092038      |
| 3.900   | -3.070332  | 9.500  | -2.078523      |
| 4.000   | -2.937390  | 9.600  | -2.071024      |
| 4.100   | -2.558380  | 9.700  | -2.075403      |
| 4.200   | -1.985461  | 9.800  | -2.061890      |
| 4.300   | -1.419774  | 9.900  | -2.054621      |
| 4.400   | -1.058203  | 10.000 | -2.029374      |
| 4.500   | -0.8898120 | 10.100 | -2.008435      |
| 4.600   | -0.9115009 | 10.200 | -1.977644      |
| 4.700   | -1.047230  | 10.300 | -1.945265      |
| 4.800   | -1.256909  | 10.400 | -1.900722      |
| 4.900   | -1.458529  | 10.500 | -1.861133      |
| 5.000   | -1.689570  | 10.600 | -1.823834      |
| 5.100   | -1.909897  | 10.700 | -1.795722      |
| 5.200   | -2.122731  | 10.800 | -1.777343      |
| 5.300   | -2.287468  | 10.900 | -1.768528      |
| 5.400   | -2.443992  | 11.000 | -1.752105      |
| 5.500   | -2.591966  | 11.100 | -1.743065      |
| 5.600   | -2.711044  | 11.200 | -1.720141      |
| 5.700   | -2.817169  | 11.300 | -1.705462      |
| 5.800   | -2.902485  | 11.400 | -1.678804      |
| 5.900   | -2.978816  | 11.500 | -1.659694      |
| 6.000   | -3.051467  | 11.600 | -1.633150      |
| 6.100   | -3.110070  | 11.700 | -1.613895      |
| 6.200   | -3.160133  | 11.800 | -1.598552      |
| 6.300   | -3.166342  | 11.900 | -1.578332      |
| 6.400   | -3.125097  | 12.000 | -1.558553      |
| 6.500   | -3.049684  | 12.100 | -1.539871      |
| 6.600   | -2.965299  | 12.200 | -1.517089      |
| 6.700   | -2.867539  | 12.300 | -1.505061      |
| 6.800   | -2.794891  | 12.400 | -1.486426      |
| 6.900   | -2.723227  | 12.500 | -1.471793      |
| 7.000   | -2.614117  | 12.600 | -1.462017      |
| 7.100   | -2.513696  | 12.700 | -1.452161      |
| 7.200   | -2.423479  | 12.800 | -1.439452      |
| 7.300   | -2.368207  | 12.900 | -1.433266      |
| 7.400   | -2.347677  | 13.000 | -1.420967      |
| 7.500   | -2.351669  | 13.100 | -1.415814      |
| 7.600   | -2.362409  | 13.200 | -1.405712      |
| 7.700   | -2.369365  | 13.300 | -1.393844      |
| 7.800   | -2.379305  | 13.400 | -1.383523      |
| 7.900   | -2.390562  | 13.500 | -1.374375      |
| 8.000   | -2.387141  | 13.600 | -1.359720      |
| 8.100   | -2.381314  | 13.700 | -1.349977      |
| 8.200   | -2.380189  | 13.800 | -1.329179      |
| 8.300   | -2.363848  | 13.900 | -1.310836      |
| 8.400   | -2.343318  | 14.000 | -1.294261      |
| 8.500   | -2.307922  | 14.100 | -1.283289      |
| 8.600   | -2.271692  | 14.200 | -1.263953      |
|         |            | 14.300 | -1.246966      |
|         |            | 14.400 | -1.232561      |
|         |            | 14.500 | -1.212534      |
|         |            | 14.600 | -1.194041      |
|         |            | 14.700 | -1.173858      |
|         |            | 14.800 | -1.159240      |
|         |            | 14.900 | -1.145899      |
|         |            | 15.000 | -1.132644      |
|         |            | 15.100 | -1.114574      |
|         |            | 15.200 | -1.092010      |
|         |            | 15.300 | -1.084640      |
|         |            | 15.400 | -1.069508      |
|         |            | 15.500 | -1.057919      |
|         |            | 15.600 | -1.048080      |
|         |            | 15.700 | -1.036350      |
|         |            | 15.800 | -1.023380      |
|         |            | 15.900 | -1.010981      |
|         |            | 16.000 | -0.9971423     |
|         |            | 16.100 | -0.9890287     |
|         |            | 16.200 | -0.9806951     |
|         |            | 16.300 | -0.9689522     |
|         |            | 16.400 | -0.9652459     |
|         |            | 16.500 | -0.9477677     |
|         |            | 16.600 | -0.9323248     |
|         |            | 16.700 | -0.9123217     |
|         |            | 16.800 | -0.8893144     |
|         |            | 16.900 | -0.8694757     |
|         |            | 17.000 | -0.8433781     |
|         |            | 17.100 | -0.8300552     |
|         |            | 17.200 | -0.8140909     |
|         |            | 17.300 | -0.7983511     |
|         |            | 17.400 | -0.7878015     |
|         |            | 17.500 | -0.7707826     |
|         |            | 17.600 | -0.7607818     |
|         |            | 17.700 | -0.7551777     |
|         |            | 17.800 | -0.7442113     |
|         |            | 17.900 | -0.7373379     |
|         |            | 18.000 | -0.7263098     |
|         |            | 18.100 | -0.7213993     |
|         |            | 18.200 | -0.7113087     |
|         |            | 18.300 | -0.6996525     |
|         |            | 18.400 | -0.6901035     |
|         |            | 18.500 | -0.6771935     |
|         |            | 18.600 | -0.6658326     |
|         |            | 18.700 | -0.6521721     |
|         |            | 18.800 | -0.6430413     |
|         |            | 18.900 | -0.6266981     |
|         |            | 19.000 | -0.6146348     |
|         |            | 19.100 | -0.6001831     |
|         |            | 19.200 | -0.5916927     |
|         |            | 19.300 | -0.5790225     |
|         |            | 19.400 | -0.5751717     |
|         |            | 19.500 | -0.5624543     |
|         |            | 19.600 | -0.5513103     |
|         |            | 19.700 | -0.5382022     |
|         |            | 19.800 | -0.5208463     |
|         |            | 19.900 | -0.5101866     |
|         |            | 20.000 | -0.4971761     |
|         |            | 20.100 | -0.4831837     |
|         |            | 20.200 | -0.4678469     |
|         |            | 20.300 | -0.4623695     |
|         |            | 20.400 | -0.4510534     |
|         |            | 20.500 | -0.4457007     |
|         |            | 20.600 | -0.4361928     |
|         |            | 20.700 | -0.4255989     |
|         |            | 20.800 | -0.4147387     |
|         |            | 20.900 | -0.4053383     |
|         |            | 21.000 | -0.3919834     |
|         |            | 21.100 | -0.3835758     |
|         |            | 21.200 | -0.3739639     |
|         |            | 21.300 | -0.3670658     |
|         |            | 21.400 | -0.3556771     |
|         |            | 21.500 | -0.3453819     |
|         |            | 21.600 | -0.3364992     |
|         |            | 21.700 | -0.3302009     |
|         |            | 21.800 | -0.3218152     |
|         |            | 21.900 | -0.3174521     |
|         |            | 22.000 | -0.3114209     |
|         |            | 22.100 | -0.3050827     |
|         |            | 22.200 | -0.3008649     |
|         |            | 22.300 | -0.2900346     |
|         |            | 22.400 | -0.2795739     |
|         |            | 22.500 | -0.2673567     |
|         |            | 22.600 | -0.2570020     |
|         |            | 22.700 | -0.2435479     |
|         |            | 22.800 | -0.2327856     |
|         |            | 22.900 | -0.2237509     |
|         |            | 23.000 | -0.2158879     |
|         |            | 23.100 | -0.2049138     |
|         |            | 23.200 | -0.1981997     |
|         |            | 23.300 | -0.1929441     |
|         |            | 23.400 | -0.1832906     |
|         |            | 23.500 | -0.1765344     |
|         |            | 23.600 | -0.1680030     |
|         |            | 23.700 | -0.1628451     |
|         |            | 23.800 | -0.1568976     |
|         |            | 23.900 | -0.1442672     |
|         |            | 24.000 | -0.1367031     |
|         |            | 24.100 | -0.1287788     |
|         |            | 24.200 | -0.1225606     |
|         |            | 24.300 | -0.1142466     |
|         |            | 24.400 | -0.1113518     |
|         |            | 24.500 | -0.1041736     |
|         |            | 24.600 | -9.8058365E-02 |
|         |            | 24.700 | -9.1925487E-02 |
|         |            | 24.800 | -8.8422284E-02 |
|         |            | 24.900 | -8.5003413E-02 |
|         |            | 25.000 | -8.3784148E-02 |

| POT-POT |          |        |           |        |           |        |               |
|---------|----------|--------|-----------|--------|-----------|--------|---------------|
| 3.100   | 13.04064 | 8.700  | 1.567013  | 14.500 | 0.7948916 | 20.300 | 0.2755226     |
| 3.200   | 11.37650 | 8.800  | 1.544020  | 14.600 | 0.7826797 | 20.400 | 0.2699943     |
| 3.300   | 9.474155 | 8.900  | 1.521699  | 14.700 | 0.7728754 | 20.500 | 0.2621227     |
| 3.400   | 7.748917 | 9.000  | 1.502319  | 14.800 | 0.7630792 | 20.600 | 0.2553159     |
| 3.500   | 6.396554 | 9.100  | 1.485749  | 14.900 | 0.7512769 | 20.700 | 0.2489178     |
| 3.600   | 5.189059 | 9.200  | 1.474560  | 15.000 | 0.7404222 | 20.800 | 0.2429783     |
| 3.700   | 4.249047 | 9.300  | 1.463975  | 15.100 | 0.7295855 | 20.900 | 0.2370581     |
| 3.800   | 3.492174 | 9.400  | 1.452546  | 15.200 | 0.7193697 | 21.000 | 0.2305611     |
| 3.900   | 2.909632 | 9.500  | 1.443555  | 15.300 | 0.7083551 | 21.100 | 0.2243788     |
| 4.000   | 2.492377 | 9.600  | 1.435797  | 15.400 | 0.6980673 | 21.200 | 0.2184787     |
| 4.100   | 2.202748 | 9.700  | 1.425421  | 15.500 | 0.6873668 | 21.300 | 0.2129135     |
| 4.200   | 2.027549 | 9.800  | 1.413593  | 15.600 | 0.6784257 | 21.400 | 0.2072980     |
| 4.300   | 1.935235 | 9.900  | 1.402501  | 15.700 | 0.6659648 | 21.500 | 0.2008978     |
| 4.400   | 1.907075 | 10.000 | 1.387453  | 15.800 | 0.6571702 | 21.600 | 0.1968497     |
| 4.500   | 1.932652 | 10.100 | 1.373685  | 15.900 | 0.6460145 | 21.700 | 0.1902744     |
| 4.600   | 2.005693 | 10.200 | 1.359213  | 16.000 | 0.6368660 | 21.800 | 0.1853095     |
| 4.700   | 2.095053 | 10.300 | 1.341606  | 16.100 | 0.6264091 | 21.900 | 0.1794673     |
| 4.800   | 2.195434 | 10.400 | 1.324304  | 16.200 | 0.6164529 | 22.000 | 0.1752651     |
| 4.900   | 2.289654 | 10.500 | 1.307276  | 16.300 | 0.6072434 | 22.100 | 0.1690163     |
| 5.000   | 2.372478 | 10.600 | 1.288403  | 16.400 | 0.5974111 | 22.200 | 0.1639653     |
| 5.100   | 2.448258 | 10.700 | 1.272076  | 16.500 | 0.5883672 | 22.300 | 0.1587714     |
| 5.200   | 2.512761 | 10.800 | 1.253466  | 16.600 | 0.5783113 | 22.400 | 0.1532098     |
| 5.300   | 2.558290 | 10.900 | 1.239053  | 16.700 | 0.5681797 | 22.500 | 0.1482917     |
| 5.400   | 2.586581 | 11.000 | 1.221762  | 16.800 | 0.5605234 | 22.600 | 0.1440566     |
| 5.500   | 2.598614 | 11.100 | 1.207088  | 16.900 | 0.5502004 | 22.700 | 0.1388927     |
| 5.600   | 2.584837 | 11.200 | 1.193690  | 17.000 | 0.5407883 | 22.800 | 0.1341956     |
| 5.700   | 2.540562 | 11.300 | 1.178576  | 17.100 | 0.5329594 | 22.900 | 0.1297243     |
| 5.800   | 2.477711 | 11.400 | 1.166515  | 17.200 | 0.5236345 | 23.000 | 0.1252601     |
| 5.900   | 2.395482 | 11.500 | 1.155272  | 17.300 | 0.5128576 | 23.100 | 0.1200791     |
| 6.000   | 2.308794 | 11.600 | 1.142180  | 17.400 | 0.5048009 | 23.200 | 0.1160318     |
| 6.100   | 2.215056 | 11.700 | 1.131131  | 17.500 | 0.4959598 | 23.300 | 0.1118681     |
| 6.200   | 2.125832 | 11.800 | 1.118366  | 17.600 | 0.4855256 | 23.400 | 0.1089347     |
| 6.300   | 2.045675 | 11.900 | 1.107395  | 17.700 | 0.4785529 | 23.500 | 0.1048607     |
| 6.400   | 1.969855 | 12.000 | 1.096364  | 17.800 | 0.4690136 | 23.600 | 0.1000849     |
| 6.500   | 1.907655 | 12.100 | 1.084776  | 17.900 | 0.4610423 | 23.700 | 9.6945569E-02 |
| 6.600   | 1.857715 | 12.200 | 1.072469  | 18.000 | 0.4527141 | 23.800 | 9.3481004E-02 |
| 6.700   | 1.824086 | 12.300 | 1.061277  | 18.100 | 0.4438167 | 23.900 | 8.9759842E-02 |
| 6.800   | 1.800880 | 12.400 | 1.046481  | 18.200 | 0.4347983 | 24.000 | 8.6125568E-02 |
| 6.900   | 1.789750 | 12.500 | 1.033764  | 18.300 | 0.4260691 | 24.100 | 8.2234867E-02 |
| 7.000   | 1.790104 | 12.600 | 1.020374  | 18.400 | 0.4192318 | 24.200 | 7.9609886E-02 |
| 7.100   | 1.796400 | 12.700 | 1.007784  | 18.500 | 0.4106770 | 24.300 | 7.6625541E-02 |
| 7.200   | 1.809848 | 12.800 | 0.9944581 | 18.600 | 0.4020989 | 24.400 | 7.2454892E-02 |
| 7.300   | 1.822772 | 12.900 | 0.9811042 | 18.700 | 0.3942235 | 24.500 | 6.9910854E-02 |
| 7.400   | 1.830953 | 13.000 | 0.9681177 | 18.800 | 0.3862351 | 24.600 | 6.7252897E-02 |
| 7.500   | 1.840871 | 13.100 | 0.9559202 | 18.900 | 0.3786976 | 24.700 | 6.4307563E-02 |
| 7.600   | 1.844801 | 13.200 | 0.9419143 | 19.000 | 0.3711593 | 24.800 | 6.1132524E-02 |
| 7.700   | 1.836494 | 13.300 | 0.9291160 | 19.100 | 0.3631333 | 24.900 | 5.8890052E-02 |
| 7.800   | 1.827260 | 13.400 | 0.9168275 | 19.200 | 0.3563054 | 25.000 | 5.6241259E-02 |
| 7.900   | 1.808675 | 13.500 | 0.9067485 | 19.300 | 0.3485853 |        |               |
| 8.000   | 1.782958 | 13.600 | 0.8935088 | 19.400 | 0.3409507 |        |               |
| 8.100   | 1.754209 | 13.700 | 0.8824925 | 19.500 | 0.3329537 |        |               |
| 8.200   | 1.720227 | 13.800 | 0.8703878 | 19.600 | 0.3256505 |        |               |
| 8.300   | 1.689690 | 13.900 | 0.8593962 | 19.700 | 0.3186060 |        |               |
| 8.400   | 1.655473 | 14.000 | 0.8486796 | 19.800 | 0.3110019 |        |               |
| 8.500   | 1.625534 | 14.100 | 0.8376440 | 19.900 | 0.3048984 |        |               |
| 8.600   | 1.594440 | 14.200 | 0.8275148 | 20.000 | 0.2975369 |        |               |
|         |          | 14.300 | 0.8168699 | 20.100 | 0.2898403 |        |               |
|         |          | 14.400 | 0.8056302 | 20.200 | 0.2817024 |        |               |

|                      |                   |                   |                       |
|----------------------|-------------------|-------------------|-----------------------|
| SUGA-CLA             | 9.500 -0.3825180  | 15.300 -0.2068666 | 21.100 -0.1122807     |
| -----                | 9.600 -0.3402327  | 15.400 -0.2051396 | 21.200 -0.1064449     |
| 3.900 6.057339       | 9.700 -0.3115053  | 15.500 -0.2024569 | 21.300 -0.1026962     |
| 4.000 5.118529       | 9.800 -0.2811271  | 15.600 -0.2000415 | 21.400 -9.8125517E-02 |
| 4.100 4.478939       | 9.900 -0.2777011  | 15.700 -0.2002846 | 21.500 -9.4717272E-02 |
| 4.200 4.338399       | 10.000 -0.2753507 | 15.800 -0.2027078 | 21.600 -8.6778633E-02 |
| 4.300 4.175231       | 10.100 -0.2844427 | 15.900 -0.2037946 | 21.700 -8.2816407E-02 |
| 4.400 2.942813       | 10.200 -0.2981780 | 16.000 -0.1978661 | 21.800 -7.6831274E-02 |
| 4.500 2.015646       | 10.300 -0.3144106 | 16.100 -0.1934654 | 21.900 -6.6137731E-02 |
| 4.600 1.241023       | 10.400 -0.3140746 | 16.200 -0.1905027 | 22.000 -6.1973359E-02 |
| 4.700 0.6621532      | 10.500 -0.3047909 | 16.300 -0.1894543 | 22.100 -5.9093896E-02 |
| 4.800 0.2965256      | 10.600 -0.2998938 | 16.400 -0.1838154 | 22.200 -5.2674327E-02 |
| 4.900 0.1419191      | 10.700 -0.2920148 | 16.500 -0.1837076 | 22.300 -4.8533507E-02 |
| 5.000 1.3450978E-02  | 10.800 -0.2906676 | 16.600 -0.1799640 | 22.400 -3.8714647E-02 |
| 5.100 -3.5895398E-03 | 10.900 -0.2974325 | 16.700 -0.1779314 | 22.500 -3.5541009E-02 |
| 5.200 -3.7966896E-02 | 11.000 -0.2975661 | 16.800 -0.1792772 | 22.600 -2.9158834E-02 |
| 5.300 -3.1327531E-02 | 11.100 -0.2919939 | 16.900 -0.1748815 | 22.700 -2.5320154E-02 |
| 5.400 -6.4674215E-03 | 11.200 -0.2858966 | 17.000 -0.1724685 | 22.800 -2.1630257E-02 |
| 5.500 -3.9348770E-03 | 11.300 -0.2893857 | 17.100 -0.1741554 | 22.900 -1.5067668E-02 |
| 5.600 -3.1903666E-03 | 11.400 -0.2836502 | 17.200 -0.1733413 | 23.000 -1.2941912E-02 |
| 5.700 -3.7446659E-02 | 11.500 -0.2819011 | 17.300 -0.1719974 | 23.100 -1.0257361E-02 |
| 5.800 -3.8295679E-02 | 11.600 -0.2702660 | 17.400 -0.1686967 | 23.200 -5.1793447E-03 |
| 5.900 -6.0529005E-02 | 11.700 -0.2713893 | 17.500 -0.1701687 | 23.300 -3.1000576E-03 |
| 6.000 -4.8181094E-02 | 11.800 -0.2626975 | 17.600 -0.1696445 | 23.400 1.0736124E-04  |
| 6.100 2.1052996E-02  | 11.900 -0.2609825 | 17.700 -0.1679516 | 23.500 5.8439369E-03  |
| 6.200 0.1077582      | 12.000 -0.2493348 | 17.800 -0.1690431 | 23.600 9.1678631E-03  |
| 6.300 0.1057525      | 12.100 -0.2478200 | 17.900 -0.1667138 | 23.700 8.9501906E-03  |
| 6.400 0.1413665      | 12.200 -0.2458289 | 18.000 -0.1649777 | 23.800 1.1625038E-02  |
| 6.500 0.1177060      | 12.300 -0.2354129 | 18.100 -0.1637676 | 23.900 1.1959649E-02  |
| 6.600 5.4995518E-02  | 12.400 -0.2287608 | 18.200 -0.1625256 | 24.000 1.6685097E-02  |
| 6.700 3.1349272E-02  | 12.500 -0.2310653 | 18.300 -0.1601617 | 24.100 2.1567451E-02  |
| 6.800 -3.9487038E-02 | 12.600 -0.2276514 | 18.400 -0.1614662 | 24.200 2.3261184E-02  |
| 6.900 -7.1135052E-02 | 12.700 -0.2222877 | 18.500 -0.1611156 | 24.300 2.5799526E-02  |
| 7.000 -0.1048035     | 12.800 -0.2236405 | 18.600 -0.1577602 | 24.400 3.0761685E-02  |
| 7.100 -0.1253206     | 12.900 -0.2250125 | 18.700 -0.1557432 | 24.500 3.1015391E-02  |
| 7.200 -0.1732092     | 13.000 -0.2272427 | 18.800 -0.1529098 | 24.600 3.6044762E-02  |
| 7.300 -0.2118960     | 13.100 -0.2279449 | 18.900 -0.1544614 | 24.700 3.8295537E-02  |
| 7.400 -0.2224959     | 13.200 -0.2242357 | 19.000 -0.1507138 | 24.800 3.9014421E-02  |
| 7.500 -0.2599376     | 13.300 -0.2278368 | 19.100 -0.1512834 | 24.900 3.7648689E-02  |
| 7.600 -0.3046108     | 13.400 -0.2286050 | 19.200 -0.1549745 | 25.000 4.4188570E-02  |
| 7.700 -0.3146741     | 13.500 -0.2248760 | 19.300 -0.1541064 |                       |
| 7.800 -0.3298331     | 13.600 -0.2308282 | 19.400 -0.1523396 |                       |
| 7.900 -0.3215512     | 13.700 -0.2237067 | 19.500 -0.1499566 |                       |
| 8.000 -0.3205485     | 13.800 -0.2259370 | 19.600 -0.1486625 |                       |
| 8.100 -0.3084180     | 13.900 -0.2189355 | 19.700 -0.1472024 |                       |
| 8.200 -0.2744283     | 14.000 -0.2242612 | 19.800 -0.1424206 |                       |
| 8.300 -0.2600158     | 14.100 -0.2180631 | 19.900 -0.1422372 |                       |
| 8.400 -0.2548105     | 14.200 -0.2181618 | 20.000 -0.1392092 |                       |
| 8.500 -0.2496446     | 14.300 -0.2145239 | 20.100 -0.1390629 |                       |
| 8.600 -0.2505632     | 14.400 -0.2141369 | 20.200 -0.1379164 |                       |
| 8.700 -0.2497354     | 14.500 -0.2097705 | 20.300 -0.1386571 |                       |
| 8.800 -0.2682451     | 14.600 -0.2112358 | 20.400 -0.1370555 |                       |
| 8.900 -0.2656654     | 14.700 -0.2083825 | 20.500 -0.1340100 |                       |
| 9.000 -0.2780211     | 14.800 -0.2081132 | 20.600 -0.1322870 |                       |
| 9.100 -0.2785319     | 14.900 -0.2082140 | 20.700 -0.1274580 |                       |
| 9.200 -0.3192863     | 15.000 -0.2105005 | 20.800 -0.1237944 |                       |
| 9.300 -0.3711901     | 15.100 -0.2088698 | 20.900 -0.1187756 |                       |
| 9.400 -0.3943034     | 15.200 -0.2115934 | 21.000 -0.1179850 |                       |

|                      |                  |                  |                       |
|----------------------|------------------|------------------|-----------------------|
| SUGA-POT             | 8.600 0.6797902  | 14.400 0.3957014 | 20.200 0.1599030      |
| -----                | 8.700 0.6468431  | 14.500 0.3937926 | 20.300 0.1506204      |
| 3.000 7.074186       | 8.800 0.6195093  | 14.600 0.3983889 | 20.400 0.1489918      |
| 3.100 6.050681       | 8.900 0.5859879  | 14.700 0.3911632 | 20.500 0.1481006      |
| 3.200 5.332740       | 9.000 0.5494065  | 14.800 0.3902603 | 20.600 0.1449591      |
| 3.300 4.567171       | 9.100 0.5145614  | 14.900 0.3888249 | 20.700 0.1403505      |
| 3.400 3.718280       | 9.200 0.4967162  | 15.000 0.3771751 | 20.800 0.1384542      |
| 3.500 2.278839       | 9.300 0.4875567  | 15.100 0.3686889 | 20.900 0.1325266      |
| 3.600 0.9163353      | 9.400 0.4829101  | 15.200 0.3577374 | 21.000 0.1245655      |
| 3.700 -4.2379368E-02 | 9.500 0.4839698  | 15.300 0.3467574 | 21.100 0.1254804      |
| 3.800 -0.5957111     | 9.600 0.4798124  | 15.400 0.3376523 | 21.200 0.1262580      |
| 3.900 -0.6759081     | 9.700 0.4753877  | 15.500 0.3291143 | 21.300 0.1191080      |
| 4.000 -0.4374445     | 9.800 0.4901587  | 15.600 0.3209583 | 21.400 0.1169706      |
| 4.100 4.2321566E-02  | 9.900 0.5012568  | 15.700 0.3146261 | 21.500 0.1120153      |
| 4.200 0.5783932      | 10.000 0.5200062 | 15.800 0.3047300 | 21.600 0.1068602      |
| 4.300 1.102934       | 10.100 0.5243509 | 15.900 0.2987058 | 21.700 9.8179907E-02  |
| 4.400 1.386171       | 10.200 0.5311233 | 16.000 0.2990114 | 21.800 9.2385180E-02  |
| 4.500 1.534093       | 10.300 0.5321660 | 16.100 0.2999884 | 21.900 8.3636574E-02  |
| 4.600 1.531056       | 10.400 0.5361684 | 16.200 0.2936330 | 22.000 7.5070322E-02  |
| 4.700 1.460859       | 10.500 0.5297707 | 16.300 0.2986516 | 22.100 6.1740525E-02  |
| 4.800 1.329933       | 10.600 0.5242330 | 16.400 0.2946672 | 22.200 5.5347167E-02  |
| 4.900 1.203605       | 10.700 0.5121804 | 16.500 0.2876928 | 22.300 5.3172346E-02  |
| 5.000 1.085581       | 10.800 0.5014598 | 16.600 0.2828457 | 22.400 4.5813303E-02  |
| 5.100 0.9853549      | 10.900 0.4807336 | 16.700 0.2829784 | 22.500 3.9056089E-02  |
| 5.200 0.8796674      | 11.000 0.4594032 | 16.800 0.2807262 | 22.600 3.1426616E-02  |
| 5.300 0.7823022      | 11.100 0.4447891 | 16.900 0.2771214 | 22.700 2.8840264E-02  |
| 5.400 0.7028166      | 11.200 0.4363748 | 17.000 0.2750069 | 22.800 2.6508786E-02  |
| 5.500 0.6379087      | 11.300 0.4260586 | 17.100 0.2708449 | 22.900 2.8079957E-02  |
| 5.600 0.5410726      | 11.400 0.4273992 | 17.200 0.2655995 | 23.000 3.3041608E-02  |
| 5.700 0.4847088      | 11.500 0.4245259 | 17.300 0.2656277 | 23.100 3.1314649E-02  |
| 5.800 0.4171192      | 11.600 0.4291315 | 17.400 0.2640465 | 23.200 3.2946613E-02  |
| 5.900 0.3772348      | 11.700 0.4319873 | 17.500 0.2624472 | 23.300 3.2070301E-02  |
| 6.000 0.3483817      | 11.800 0.4326856 | 17.600 0.2629102 | 23.400 2.8584313E-02  |
| 6.100 0.3263535      | 11.900 0.4357013 | 17.700 0.2576246 | 23.500 2.3389338E-02  |
| 6.200 0.3319111      | 12.000 0.4291633 | 17.800 0.2572735 | 23.600 1.6688591E-02  |
| 6.300 0.3327388      | 12.100 0.4209622 | 17.900 0.2490486 | 23.700 1.4472407E-02  |
| 6.400 0.3593773      | 12.200 0.4149661 | 18.000 0.2406189 | 23.800 7.9916837E-03  |
| 6.500 0.3850015      | 12.300 0.4154997 | 18.100 0.2324412 | 23.900 8.4840087E-03  |
| 6.600 0.4152347      | 12.400 0.4057062 | 18.200 0.2245016 | 24.000 1.8777258E-03  |
| 6.700 0.4448345      | 12.500 0.3930163 | 18.300 0.2214724 | 24.100 5.4770155E-04  |
| 6.800 0.4908872      | 12.600 0.3768989 | 18.400 0.2166206 | 24.200 -1.8463933E-03 |
| 6.900 0.5401371      | 12.700 0.3733574 | 18.500 0.2142471 | 24.300 -2.7268792E-03 |
| 7.000 0.5695753      | 12.800 0.3676620 | 18.600 0.2141064 | 24.400 -4.6461574E-03 |
| 7.100 0.5955031      | 12.900 0.3710506 | 18.700 0.2103470 | 24.500 -1.0921139E-02 |
| 7.200 0.6032125      | 13.000 0.3767470 | 18.800 0.2084914 | 24.600 -1.1840725E-02 |
| 7.300 0.6074899      | 13.100 0.3849287 | 18.900 0.2027245 | 24.700 -1.5648076E-02 |
| 7.400 0.6391379      | 13.200 0.3865231 | 19.000 0.2026845 | 24.800 -1.5720174E-02 |
| 7.500 0.6863623      | 13.300 0.3893654 | 19.100 0.2015363 | 24.900 -1.6351840E-02 |
| 7.600 0.7089647      | 13.400 0.3942832 | 19.200 0.2012213 | 25.000 -1.5208032E-02 |
| 7.700 0.7249061      | 13.500 0.3912933 | 19.300 0.1985749 |                       |
| 7.800 0.7567205      | 13.600 0.3867041 | 19.400 0.1982357 |                       |
| 7.900 0.7815118      | 13.700 0.3903974 | 19.500 0.2000761 |                       |
| 8.000 0.7916179      | 13.800 0.3910739 | 19.600 0.1890499 |                       |
| 8.100 0.8026752      | 13.900 0.3949610 | 19.700 0.1890305 |                       |
| 8.200 0.7776001      | 14.000 0.3941157 | 19.800 0.1851548 |                       |
| 8.300 0.7601092      | 14.100 0.4010519 | 19.900 0.1811693 |                       |
| 8.400 0.7331583      | 14.200 0.3995817 | 20.000 0.1749023 |                       |
| 8.500 0.7062033      | 14.300 0.4023407 | 20.100 0.1628762 |                       |

|                      |                   |                       |                       |
|----------------------|-------------------|-----------------------|-----------------------|
| THYM-CLA             | 9.700 -0.4615617  | 15.500 -0.2167239     | 21.300 -2.0716334E-02 |
| -----                | 9.800 -0.4589663  | 15.600 -0.2126100     | 21.400 -1.3078701E-02 |
| 4.100 3.241296       | 9.900 -0.4700517  | 15.700 -0.2220611     | 21.500 -1.3779464E-02 |
| 4.200 0.9669756      | 10.000 -0.4511009 | 15.800 -0.2159324     | 21.600 -8.8896966E-03 |
| 4.300 -0.4941403     | 10.100 -0.4489846 | 15.900 -0.2171618     | 21.700 -5.1836395E-03 |
| 4.400 -1.353186      | 10.200 -0.4610376 | 16.000 -0.2065525     | 21.800 -2.8848343E-03 |
| 4.500 -1.489762      | 10.300 -0.4724950 | 16.100 -0.2195452     | 21.900 4.5159496E-03  |
| 4.600 -1.114486      | 10.400 -0.4616719 | 16.200 -0.2079827     | 22.000 1.2282645E-02  |
| 4.700 -0.6101706     | 10.500 -0.4417412 | 16.300 -0.1958391     | 22.100 1.8018171E-02  |
| 4.800 -0.1171921     | 10.600 -0.4221582 | 16.400 -0.2004412     | 22.200 1.9467873E-02  |
| 4.900 0.3313150      | 10.700 -0.4128671 | 16.500 -0.1871184     | 22.300 2.0543501E-02  |
| 5.000 0.4839434      | 10.800 -0.4151692 | 16.600 -0.1926199     | 22.400 1.8333536E-02  |
| 5.100 0.5894338      | 10.900 -0.4210663 | 16.700 -0.1858178     | 22.500 2.4697101E-02  |
| 5.200 0.3489915      | 11.000 -0.3965629 | 16.800 -0.1771780     | 22.600 2.3896936E-02  |
| 5.300 6.9347568E-02  | 11.100 -0.3762403 | 16.900 -0.1678580     | 22.700 1.6399030E-02  |
| 5.400 -3.6048919E-02 | 11.200 -0.3936755 | 17.000 -0.1608920     | 22.800 1.5917499E-02  |
| 5.500 -8.2649276E-02 | 11.300 -0.4170619 | 17.100 -0.1555211     | 22.900 2.1918526E-02  |
| 5.600 -0.3074142     | 11.400 -0.3816667 | 17.200 -0.1479430     | 23.000 2.6989032E-02  |
| 5.700 -0.3289267     | 11.500 -0.3802374 | 17.300 -0.1423543     | 23.100 1.7878164E-02  |
| 5.800 -0.4011083     | 11.600 -0.4027767 | 17.400 -0.1406475     | 23.200 2.2695715E-02  |
| 5.900 -0.4687025     | 11.700 -0.3724247 | 17.500 -0.1381066     | 23.300 2.1533366E-02  |
| 6.000 -0.4988720     | 11.800 -0.3681092 | 17.600 -0.1294870     | 23.400 2.4282278E-02  |
| 6.100 -0.5578153     | 11.900 -0.3633498 | 17.700 -0.1290268     | 23.500 2.9879201E-02  |
| 6.200 -0.5506117     | 12.000 -0.3579293 | 17.800 -0.1230778     | 23.600 2.9669300E-02  |
| 6.300 -0.6114950     | 12.100 -0.3606672 | 17.900 -0.1173108     | 23.700 3.2674097E-02  |
| 6.400 -0.5712658     | 12.200 -0.3526427 | 18.000 -0.1043508     | 23.800 2.4886588E-02  |
| 6.500 -0.6089163     | 12.300 -0.3366905 | 18.100 -0.1003746     | 23.900 3.6478229E-02  |
| 6.600 -0.6115512     | 12.400 -0.3461320 | 18.200 -9.5357873E-02 | 24.000 3.5384446E-02  |
| 6.700 -0.6184510     | 12.500 -0.3459789 | 18.300 -8.7683305E-02 | 24.100 4.4784795E-02  |
| 6.800 -0.5790120     | 12.600 -0.3298084 | 18.400 -8.6311229E-02 | 24.200 4.2036526E-02  |
| 6.900 -0.6490933     | 12.700 -0.3483231 | 18.500 -7.4446335E-02 | 24.300 4.1280027E-02  |
| 7.000 -0.6557013     | 12.800 -0.3307527 | 18.600 -7.8169174E-02 | 24.400 4.6885997E-02  |
| 7.100 -0.6128139     | 12.900 -0.3305652 | 18.700 -7.3391497E-02 | 24.500 5.0881289E-02  |
| 7.200 -0.6432981     | 13.000 -0.3296126 | 18.800 -6.0207065E-02 | 24.600 5.0770506E-02  |
| 7.300 -0.5583873     | 13.100 -0.3323391 | 18.900 -6.4353734E-02 | 24.700 5.1722806E-02  |
| 7.400 -0.5744275     | 13.200 -0.3198972 | 19.000 -6.8211257E-02 | 24.800 5.5184610E-02  |
| 7.500 -0.5476213     | 13.300 -0.3175979 | 19.100 -5.1447324E-02 | 24.900 5.3911615E-02  |
| 7.600 -0.5098712     | 13.400 -0.3300893 | 19.200 -4.9616266E-02 | 25.000 5.5999141E-02  |
| 7.700 -0.5257982     | 13.500 -0.3028747 | 19.300 -4.8001647E-02 |                       |
| 7.800 -0.5628921     | 13.600 -0.3148966 | 19.400 -4.4470415E-02 |                       |
| 7.900 -0.5209884     | 13.700 -0.3032603 | 19.500 -4.4644445E-02 |                       |
| 8.000 -0.5412176     | 13.800 -0.2881995 | 19.600 -3.6792930E-02 |                       |
| 8.100 -0.5813953     | 13.900 -0.2937977 | 19.700 -3.8312070E-02 |                       |
| 8.200 -0.5625178     | 14.000 -0.2811188 | 19.800 -3.1887498E-02 |                       |
| 8.300 -0.5850251     | 14.100 -0.2669698 | 19.900 -3.5078239E-02 |                       |
| 8.400 -0.5777852     | 14.200 -0.2699084 | 20.000 -3.6287997E-02 |                       |
| 8.500 -0.5688201     | 14.300 -0.2513720 | 20.100 -3.9369773E-02 |                       |
| 8.600 -0.5640778     | 14.400 -0.2472322 | 20.200 -2.9734256E-02 |                       |
| 8.700 -0.5677201     | 14.500 -0.2575196 | 20.300 -2.5128834E-02 |                       |
| 8.800 -0.5630404     | 14.600 -0.2459829 | 20.400 -2.1535154E-02 |                       |
| 8.900 -0.5720704     | 14.700 -0.2370353 | 20.500 -2.6305128E-02 |                       |
| 9.000 -0.5568351     | 14.800 -0.2363841 | 20.600 -2.3036918E-02 |                       |
| 9.100 -0.5388367     | 14.900 -0.2386825 | 20.700 -2.1987565E-02 |                       |
| 9.200 -0.5222650     | 15.000 -0.2358169 | 20.800 -2.3944208E-02 |                       |
| 9.300 -0.5289152     | 15.100 -0.2223049 | 20.900 -1.0812505E-02 |                       |
| 9.400 -0.5053415     | 15.200 -0.2259040 | 21.000 -2.1342335E-02 |                       |
| 9.500 -0.4940272     | 15.300 -0.2149524 | 21.100 -1.5241149E-02 |                       |
| 9.600 -0.4846655     | 15.400 -0.2255418 | 21.200 -1.7871676E-02 |                       |

| THYM-POT |                |        |                |        |                |        |                |
|----------|----------------|--------|----------------|--------|----------------|--------|----------------|
| -----    |                | 9.200  | 0.3034597      | 14.600 | 9.2177942E-02  | 20.000 | -7.1280584E-02 |
|          |                | 9.300  | 0.2472814      | 14.700 | 9.8708615E-02  | 20.100 | -7.7538669E-02 |
| 4.000    | 6.774306       | 9.400  | 0.2205909      | 14.800 | 8.7053381E-02  | 20.200 | -9.2025749E-02 |
| 4.100    | 5.731304       | 9.500  | 0.1686880      | 14.900 | 9.0198353E-02  | 20.300 | -9.4064869E-02 |
| 4.200    | 4.843624       | 9.600  | 0.1255500      | 15.000 | 8.1492983E-02  | 20.400 | -9.3522228E-02 |
| 4.300    | 3.744660       | 9.700  | 0.1117010      | 15.100 | 6.9465980E-02  | 20.500 | -8.5005499E-02 |
| 4.400    | 2.881190       | 9.800  | 9.2140675E-02  | 15.200 | 6.1235134E-02  | 20.600 | -8.2537204E-02 |
| 4.500    | 2.108712       | 9.900  | 0.1247136      | 15.300 | 3.5714496E-02  | 20.700 | -8.6319551E-02 |
| 4.600    | 1.608566       | 10.000 | 0.1678664      | 15.400 | 1.1863270E-02  | 20.800 | -8.7681673E-02 |
| 4.700    | 1.419508       | 10.100 | 0.1815902      | 15.500 | -1.8024718E-02 | 20.900 | -9.2203990E-02 |
| 4.800    | 1.281409       | 10.200 | 0.1871055      | 15.600 | -3.9330415E-02 | 21.000 | -9.8152213E-02 |
| 4.900    | 1.004289       | 10.300 | 0.1876686      | 15.700 | -7.2181888E-02 | 21.100 | -0.1040441     |
| 5.000    | 0.7896758      | 10.400 | 0.1800102      | 15.800 | -8.9336880E-02 | 21.200 | -0.1000587     |
| 5.100    | 0.4670358      | 10.500 | 0.1649790      | 15.900 | -0.1001837     | 21.300 | -9.4634496E-02 |
| 5.200    | 0.1680737      | 10.600 | 0.1523008      | 16.000 | -8.8950440E-02 | 21.400 | -7.8889139E-02 |
| 5.300    | -7.6657601E-02 | 10.700 | 0.1333657      | 16.100 | -6.5948151E-02 | 21.500 | -7.5049683E-02 |
| 5.400    | -0.2066351     | 10.800 | 0.1326025      | 16.200 | -3.6856286E-02 | 21.600 | -6.8869613E-02 |
| 5.500    | -0.1021525     | 10.900 | 0.1244643      | 16.300 | -4.5341607E-03 | 21.700 | -6.2022071E-02 |
| 5.600    | 0.1945792      | 11.000 | 0.1260760      | 16.400 | 3.5561086E-03  | 21.800 | -6.1629817E-02 |
| 5.700    | 0.5204324      | 11.100 | 0.1283293      | 16.500 | 3.5433233E-02  | 21.900 | -5.3971890E-02 |
| 5.800    | 0.7747684      | 11.200 | 0.1194690      | 16.600 | 2.5513805E-02  | 22.000 | -5.3362962E-02 |
| 5.900    | 0.8802529      | 11.300 | 0.1298956      | 16.700 | 3.5939872E-02  | 22.100 | -5.7382140E-02 |
| 6.000    | 0.8524720      | 11.400 | 0.1187953      | 16.800 | 2.8625207E-02  | 22.200 | -4.9926020E-02 |
| 6.100    | 0.7357361      | 11.500 | 0.1269588      | 16.900 | 3.7565574E-02  | 22.300 | -4.9072031E-02 |
| 6.200    | 0.6005728      | 11.600 | 0.1286610      | 17.000 | 3.4600314E-02  | 22.400 | -4.8696660E-02 |
| 6.300    | 0.5223524      | 11.700 | 0.1347692      | 17.100 | 3.5114568E-02  | 22.500 | -4.5120984E-02 |
| 6.400    | 0.4810722      | 11.800 | 0.1337739      | 17.200 | 2.7618475E-02  | 22.600 | -5.2789420E-02 |
| 6.500    | 0.4272870      | 11.900 | 0.1239214      | 17.300 | 2.7535714E-02  | 22.700 | -5.1342830E-02 |
| 6.600    | 0.4296415      | 12.000 | 0.1174254      | 17.400 | 1.3324864E-02  | 22.800 | -4.3057516E-02 |
| 6.700    | 0.4545836      | 12.100 | 0.1118143      | 17.500 | 5.1755197E-03  | 22.900 | -4.4094525E-02 |
| 6.800    | 0.4535653      | 12.200 | 9.9294059E-02  | 17.600 | 8.5894316E-03  | 23.000 | -4.9926933E-02 |
| 6.900    | 0.4454345      | 12.300 | 9.8418139E-02  | 17.700 | 2.6851599E-03  | 23.100 | -5.5075202E-02 |
| 7.000    | 0.3804878      | 12.400 | 9.4171248E-02  | 17.800 | -2.8917086E-03 | 23.200 | -4.9136080E-02 |
| 7.100    | 0.3286875      | 12.500 | 9.2214867E-02  | 17.900 | 2.6325348E-03  | 23.300 | -4.8445273E-02 |
| 7.200    | 0.2505236      | 12.600 | 9.3962036E-02  | 18.000 | -7.2649913E-03 | 23.400 | -4.7347583E-02 |
| 7.300    | 0.2028721      | 12.700 | 9.6854709E-02  | 18.100 | -1.0791806E-02 | 23.500 | -5.2506380E-02 |
| 7.400    | 0.1692418      | 12.800 | 0.1094883      | 18.200 | -7.1561560E-03 | 23.600 | -4.7812365E-02 |
| 7.500    | 0.1471226      | 12.900 | 0.1156815      | 18.300 | -2.0511728E-02 | 23.700 | -4.6168286E-02 |
| 7.600    | 0.1304407      | 13.000 | 0.1081807      | 18.400 | -9.4023123E-03 | 23.800 | -4.8820797E-02 |
| 7.700    | 0.1166523      | 13.100 | 9.2917323E-02  | 18.500 | -2.2693366E-02 | 23.900 | -4.9187530E-02 |
| 7.800    | 0.1588424      | 13.200 | 5.1255014E-02  | 18.600 | -1.9922681E-02 | 24.000 | -5.0563004E-02 |
| 7.900    | 0.2103714      | 13.300 | 2.1724274E-02  | 18.700 | -2.4261884E-02 | 24.100 | -4.4292174E-02 |
| 8.000    | 0.2814094      | 13.400 | -1.2598874E-02 | 18.800 | -2.7322011E-02 | 24.200 | -4.5036227E-02 |
| 8.100    | 0.3714676      | 13.500 | -5.6779530E-02 | 18.900 | -2.7999157E-02 | 24.300 | -3.9825182E-02 |
| 8.200    | 0.4619852      | 13.600 | -7.0034854E-02 | 19.000 | -2.9879937E-02 | 24.400 | -4.2389974E-02 |
| 8.300    | 0.4754328      | 13.700 | -5.4972176E-02 | 19.100 | -3.2048542E-02 | 24.500 | -4.6985812E-02 |
| 8.400    | 0.4878475      | 13.800 | -3.7131395E-02 | 19.200 | -3.5335556E-02 | 24.600 | -4.2042539E-02 |
| 8.500    | 0.4945201      | 13.900 | 6.5600006E-03  | 19.300 | -3.4546860E-02 | 24.700 | -4.2689558E-02 |
| 8.600    | 0.4671606      | 14.000 | 4.2316779E-02  | 19.400 | -4.1881673E-02 | 24.800 | -4.9814478E-02 |
| 8.700    | 0.4704779      | 14.100 | 6.7183495E-02  | 19.500 | -4.5012638E-02 | 24.900 | -4.3990444E-02 |
| 8.800    | 0.4482508      | 14.200 | 8.3194569E-02  | 19.600 | -4.9319439E-02 | 25.000 | -4.3433361E-02 |
| 8.900    | 0.4060091      | 14.300 | 8.4743015E-02  | 19.700 | -5.5859517E-02 |        |                |
| 9.000    | 0.3856758      | 14.400 | 9.3353838E-02  | 19.800 | -5.1854126E-02 |        |                |
| 9.100    | 0.3287310      | 14.500 | 9.2614904E-02  | 19.900 | -5.9446964E-02 |        |                |
